# Supplementary material for: Identification and Phylogenetic Analysis of Heme Synthesis Genes in Trypanosomatids and Their Bacterial Endosymbionts
Source: PubMed Central journal article supplement (PMC3154472; doi:10.1371/journal.pone.0023518), 2011-08-10
Supplement: pone.0023518.s015.pdf [file pone.0023518.s015.pdf]

| <b>Accession number</b> | <b>Organism</b>                                         |
|-------------------------|---------------------------------------------------------|
| <b>JF756625</b>         | <i>Candidatus Kinetoplastibacterium blastocrithidii</i> |
| <b>JF756626</b>         | <i>Candidatus Kinetoplastibacterium crithidii</i>       |
| <b>JF756627</b>         | <i>Candidatus Kinetoplastibacterium galatii</i>         |
| <b>JF756628</b>         | <i>Candidatus Kinetoplastibacterium oncopeltii</i>      |
| ZP_06684613.1           | <i>Achromobacter piechaudii</i> ATCC 43553              |
| YP_003981972            | <i>Achromobacter xylosoxidans</i> A8                    |
| YP_157646.1             | <i>Aromatoleum aromaticum</i> EbN1                      |
| YP_932484.1             | <i>Azoarcus</i> sp. BH72                                |
| YP_003447322            | <i>Azospirillum</i> sp. B510                            |
| YP_784834               | <i>Bordetella avium</i> 197N                            |
| NP_886932.1             | <i>Bordetella bronchiseptica</i> RB50                   |
| NP_882735.1             | <i>Bordetella parapertussis</i> 12822                   |
| NP_879514.1             | <i>Bordetella pertussis</i> Tohama I                    |
| YP_001633161.1          | <i>Bordetella petrii</i> DSM 12804                      |
| YP_001807154.1          | <i>Burkholderia ambifaria</i> MC40-6                    |
| NP_899749.1             | <i>Chromobacterium violaceum</i> ATCC 12472             |
| YP_003276820.1          | <i>Comamonas testosteroni</i> CNB-2                     |
| YP_286888.1             | <i>Dechloromonas aromatica</i> RCB                      |
| YP_003848303.1          | <i>Gallionella capsiferiformans</i> ES-2                |
| YP_001098549.1          | <i>Hermiimonas arsenicoxydans</i>                       |
| YP_001351904.1          | <i>Janthinobacterium</i> sp. Marseille                  |
| YP_002797094.1          | <i>Laribacter hongkongensis</i> HLHK9                   |
| YP_420980               | <i>Magnetospirillum magneticum</i> AMB-1                |
| YP_001019721.1          | <i>Methylibium petroleiphilum</i> PM1                   |
| YP_546579.1             | <i>Methylobacillus flagellatus</i> KT                   |
| YP_003049669.1          | <i>Methylotenera mobilis</i> JLW8                       |
| YP_003052281.1          | <i>Methylovorus</i> sp. SIP3-4                          |
| NP_273620.1             | <i>Neisseria meningitidis</i> MC58                      |
| NP_841936.1             | <i>Nitrosomonas europaea</i> ATCC 19718                 |
| YP_747055.1             | <i>Nitrosomonas eutropha</i> C91                        |
| YP_413321.1             | <i>Nitrospira multififormis</i> ATCC 25196              |
| YP_001797072.1          | <i>Polynucleobacter necessarius necessarius</i> STIR1   |
| YP_001350647.1          | <i>Pseudomonas aeruginosa</i> PA7                       |
| YP_727776.1             | <i>Ralstonia eutropha</i> H16                           |
| YP_522546.1             | <i>Rhodoferax ferrireducens</i> T118                    |
| YP_425840               | <i>Rhodospirillum rubrum</i> ATCC 11170                 |
| YP_003522884.1          | <i>Sideroxydans lithotrophicus</i> ES-1                 |
| YP_316250.1             | <i>Thiobacillus denitrificans</i> ATCC 25259            |
| NP_299925.1             | <i>Xylella fastidiosa</i> 9a5c                          |
| YP_001162473.1          | <i>Yersinia pestis</i> Pestoides F                      |

GenBank accession numbers in bold typeface were sequenced in this work.
