# Supplementary material for: Identification and Phylogenetic Analysis of Heme Synthesis Genes in Trypanosomatids and Their Bacterial Endosymbionts
Source: PubMed Central journal article supplement (PMC3154472; doi:10.1371/journal.pone.0023518), 2011-08-10
Supplement: pone.0023518.s018.pdf [file pone.0023518.s018.pdf]

| <b>Accession number</b> | <b>Organism</b>                                         |
|-------------------------|---------------------------------------------------------|
| <b>JF756613</b>         | <i>Candidatus Kinetoplastibacterium blastocrithidii</i> |
| <b>JF756614</b>         | <i>Candidatus Kinetoplastibacterium crithidii</i>       |
| <b>JF756615</b>         | <i>Candidatus Kinetoplastibacterium galatii</i>         |
| <b>JF756616</b>         | <i>Candidatus Kinetoplastibacterium oncopeltii</i>      |
| ZP_06686723.1           | <i>Achromobacter piechaudii</i> ATCC 43553              |
| YP_003977929            | <i>Achromobacter xylosoxidans</i> A8                    |
| YP_002551012            | <i>Agrobacterium vitis</i> S4                           |
| YP_157636.1             | <i>Aromatoleum aromaticum</i> EbN1                      |
| YP_932497.1             | <i>Azoarcus</i> sp. BH72                                |
| YP_786814               | <i>Bordetella avium</i> 197N                            |
| NP_888628.1             | <i>Bordetella bronchiseptica</i> RB50                   |
| NP_884865.1             | <i>Bordetella parapertussis</i> 12822                   |
| NP_881164.1             | <i>Bordetella pertussis</i> Tohama I                    |
| YP_001630674.1          | <i>Bordetella petrii</i> DSM 12804                      |
| YP_001809028.1          | <i>Burkholderia ambifaria</i> MC40-6                    |
| YP_002515445            | <i>Caulobacter crescentus</i> NA1000                    |
| NP_899724.2             | <i>Chromobacterium violaceum</i> ATCC 12472             |
| YP_003279574.1          | <i>Comamonas testosteroni</i> CNB-2                     |
| YP_286873.1             | <i>Dechloromonas aromatica</i> RCB                      |
| YP_003848274.1          | <i>Gallionella capsiferriformans</i> ES-2               |
| YP_001099316.1          | <i>Herminiimonas arsenicoxydans</i>                     |
| YP_001352832.1          | <i>Janthinobacterium</i> sp. Marseille                  |
| YP_002797123.1          | <i>Laribacter hongkongensis</i> HLHK9                   |
| YP_001022190.1          | <i>Methylibium petroleiphilum</i> PM1                   |
| YP_544147.1             | <i>Methylobacillus flagellatus</i> KT                   |
| YP_003047603.1          | <i>Methylotenera mobilis</i> JLW8                       |
| YP_003049810.1          | <i>Methylovorus</i> sp. SIP3-4                          |
| NP_273584.1             | <i>Neisseria meningitidis</i> MC58                      |
| NP_840674.1             | <i>Nitrosomonas europaea</i> ATCC 19718                 |
| YP_747258.2             | <i>Nitrosomonas eutropha</i> C91                        |
| YP_413369.1             | <i>Nitrosospora multififormis</i> ATCC 25196            |
| YP_001797959.1          | <i>Polynucleobacter necessarius necessarius</i> STIR1   |
| YP_001351322.1          | <i>Pseudomonas aeruginosa</i> PA7                       |
| YP_727364.1             | <i>Ralstonia eutropha</i> H16                           |
| YP_002526398            | <i>Rhodobacter sphaeroides</i> KD131                    |
| YP_522975.1             | <i>Rhodoferrax ferrireducens</i> T118                   |
| YP_003522896.1          | <i>Sideroxydans lithotrophicus</i> ES-1                 |
| YP_316326.1             | <i>Thiobacillus denitrificans</i> ATCC 25259            |
| NP_298916.1             | <i>Xylella fastidiosa</i> 9a5c                          |
| YP_001164793.1          | <i>Yersinia pestis</i> Pestoides F                      |

GenBank accession numbers in bold typeface were sequenced in this work.
