# Supplementary material for: Identification and Phylogenetic Analysis of Heme Synthesis Genes in Trypanosomatids and Their Bacterial Endosymbionts
Source: PubMed Central journal article supplement (PMC3154472; doi:10.1371/journal.pone.0023518), 2011-08-10
Supplement: pone.0023518.s021.pdf [file pone.0023518.s021.pdf]

| <b>Accession number</b> | <b>Organism</b>                                         |
|-------------------------|---------------------------------------------------------|
| <b>JF756601</b>         | <i>Candidatus Kinetoplastibacterium blastocrithidii</i> |
| <b>JF756602</b>         | <i>Candidatus Kinetoplastibacterium crithidii</i>       |
| <b>JF756603</b>         | <i>Candidatus Kinetoplastibacterium galatii</i>         |
| <b>JF756604</b>         | <i>Candidatus Kinetoplastibacterium oncopeltii</i>      |
| ZP_06688009.1           | <i>Achromobacter piechaudii</i> ATCC 43553              |
| YP_002548276            | <i>Agrobacterium vitis</i> S4                           |
| YP_158319.1             | <i>Aromatoleum aromaticum</i> EbN1                      |
| YP_935467.1             | <i>Azoarcus</i> sp. BH72                                |
| YP_786449               | <i>Bordetella avium</i> 197N                            |
| NP_889491.1             | <i>Bordetella bronchiseptica</i> RB50                   |
| NP_885176.1             | <i>Bordetella parapertussis</i> 12822                   |
| NP_880328.1             | <i>Bordetella pertussis</i> Tohama I                    |
| YP_001630884.1          | <i>Bordetella petrii</i> DSM 12804                      |
| YP_001807574.1          | <i>Burkholderia ambifaria</i> MC40-6                    |
| YP_002515519            | <i>Caulobacter crescentus</i> NA1000                    |
| NP_900597.1             | <i>Chromobacterium violaceum</i> ATCC 12472             |
| YP_003279827.1          | <i>Comamonas testosteroni</i> CNB-2                     |
| YP_287051.1             | <i>Dechloromonas aromatica</i> RCB                      |
| YP_003846203.1          | <i>Gallionella capsiferriiformans</i> ES-2              |
| YP_001100384.1          | <i>Hermiimonas arsenicoxydans</i>                       |
| YP_001353024.1          | <i>Janthinobacterium</i> sp. Marseille                  |
| YP_002795933.1          | <i>Laribacter hongkongensis</i> HLHK9                   |
| YP_001021892.1          | <i>Methylibium petroleiphilum</i> PM1                   |
| YP_544152.1             | <i>Methylobacillus flagellatus</i> KT                   |
| YP_003047608.1          | <i>Methylotenera mobilis</i> JLW8                       |
| YP_003049820.1          | <i>Methylovorus</i> sp. SIP3-4                          |
| NP_273707.1             | <i>Neisseria meningitidis</i> MC58                      |
| NP_840367.1             | <i>Nitrosomonas europaea</i> ATCC 19718                 |
| YP_746559.1             | <i>Nitrosomonas eutropha</i> C91                        |
| YP_410769.1             | <i>Nitrosospira multiformis</i> ATCC 25196              |
| YP_001797613.1          | <i>Polynucleobacter necessarius necessarius</i> STIR1   |
| YP_001345880.1          | <i>Pseudomonas aeruginosa</i> PA7                       |
| YP_725460.1             | <i>Ralstonia eutropha</i> H16                           |
| YP_522892.1             | <i>Rhodoferax ferrireducens</i> T118                    |
| YP_003523033.1          | <i>Sideroxydans lithotrophicus</i> ES-1                 |
| YP_314237.1             | <i>Thiobacillus denitrificans</i> ATCC 25259            |
| NP_298796.1             | <i>Xylella fastidiosa</i> 9a5c                          |
| YP_001161952.1          | <i>Yersinia pestis</i> Pestoides F                      |

GenBank accession numbers in bold typeface were sequenced in this work.
