# Supplementary material for: Identification and Phylogenetic Analysis of Heme Synthesis Genes in Trypanosomatids and Their Bacterial Endosymbionts
Source: PubMed Central journal article supplement (PMC3154472; doi:10.1371/journal.pone.0023518), 2011-08-10
Supplement: pone.0023518.s022.pdf [file pone.0023518.s022.pdf]

| Accession number              | Organism                                          |
|-------------------------------|---------------------------------------------------|
| <b>JF756596</b>               | <i>Candidatus Kinetoplastibacterium crithidii</i> |
| <b>JF756665</b>               | <i>Angomonas deanei</i> TCC036E                   |
| <b>JF756666</b>               | <i>Angomonas deanei</i> TCC036E                   |
| scf7180000114303:24690..23785 | <i>Crithidia fasciculata</i> Cf-C1                |
| <b>JF756661</b>               | <i>Endotrypanum schaudinni</i> TCC224             |
| XP_001562058.1                | <i>Leishmania braziliensis</i>                    |
| 3EJO_A                        | <i>Leishmania donovani</i>                        |
| XP_001463209.1                | <i>Leishmania infantum</i>                        |
| XP_001680900.1                | <i>Leishmania major</i> Friedlin                  |
| 197725360                     | <i>Leishmania naiffi</i>                          |
| <b>JF756659</b>               | <i>Leptomonas costaricensis</i> TCC169E           |
| <b>JF756660</b>               | <i>Leptomonas costaricensis</i> TCC169E           |
| <b>JF756662</b>               | <i>Strigomonas culicis</i> TCC012E                |
| <b>JF756663</b>               | <i>Strigomonas galati</i> TCC219                  |
| <b>JF756664</b>               | <i>Strigomonas oncopelti</i> TCC290E              |
| YP_001514978.1                | <i>Acaryochloris marina</i> MBIC11017             |
| YP_003187334.1                | <i>Acetobacter pasteurianus</i> IFO 3283-01       |
| ZP_06686877.1                 | <i>Achromobacter piechaudii</i> ATCC 43553        |
| YP_003978147.1                | <i>Achromobacter xylosoxidans</i> A8              |
| YP_001236053.1                | <i>Acidiphilium cryptum</i> JF-5                  |
| ZP_05292918.1                 | <i>Acidithiobacillus caldus</i> ATCC 51756        |
| YP_002220338.1                | <i>Acidithiobacillus ferrooxidans</i> ATCC 53993  |
| ZP_06212639.1                 | <i>Acidovorax avenae avenae</i> ATCC 19860        |
| ZP_04763980.1                 | <i>Acidovorax delafieldii</i> 2AN                 |
| YP_002553162.1                | <i>Acidovorax ebreus</i> TPSY                     |
| ZP_06066830.1                 | <i>Acinetobacter junii</i> SH205                  |
| ZP_06070563.1                 | <i>Acinetobacter lwoffii</i> SH145                |
| XP_001952689.1                | <i>Acyrtosiphon pisum</i>                         |
| XP_001663577.1                | <i>Aedes aegypti</i>                              |
| YP_854793.1                   | <i>Aeromonas hydrophila hydrophila</i> ATCC 7966  |
| YP_001143820.1                | <i>Aeromonas salmonicida salmonicida</i> A449     |
| ZP_07027835.1                 | <i>Afipia</i> sp. 1NLS2                           |
| YP_002545149.1                | <i>Agrobacterium radiobacter</i> K84              |
| NP_355204.1                   | <i>Agrobacterium tumefaciens</i> str. C58         |
| YP_002550317.1                | <i>Agrobacterium vitis</i> S4                     |
| ZP_07375603.1                 | <i>Ahrensia</i> sp. R2A130                        |
| EFB22733.1                    | <i>Ailuropoda melanoleuca</i>                     |
| EER37262.1                    | <i>Ajellomyces capsulatus</i> H143                |
| EEQ90579.1                    | <i>Ajellomyces dermatitidis</i> ER-3              |
| YP_691855.1                   | <i>Alcanivorax borkumensis</i> SK2                |
| ZP_07720312.1                 | <i>Algoriphagus</i> sp. PR1                       |
| ZP_07021521.1                 | <i>Alicyclophilus denitrificans</i> BC            |
| YP_743464.1                   | <i>Alkalilimnicola ehrlichii</i> MLHE-1           |
| YP_003444553.1                | <i>Allochromatium vinosum</i> DSM 180             |
| ZP_02189150.1                 | alpha proteobacterium BAL199                      |
| ZP_06054942.1                 | alpha proteobacterium HIMB114                     |
| ZP_01446499.1                 | alpha proteobacterium HTCC2255                    |
| ZP_01614072.1                 | Alteromonadales bacterium TW-7                    |
| YP_002124342.1                | <i>Alteromonas macleodii</i> 'Deep ecotype'       |
| BAB41185.1                    | <i>Amaranthus tricolor</i>                        |
| YP_003764985.1                | <i>Amycolatopsis mediterranei</i> U32             |

|                |                                               |
|----------------|-----------------------------------------------|
| YP_325488.1    | <i>Anabaena variabilis</i> ATCC 29413         |
| YP_325073.1    | <i>Anabaena variabilis</i> ATCC 29413         |
| YP_002492357.1 | <i>Anaeromyxobacter dehalogenans</i> 2CP-1    |
| YP_001378891.1 | <i>Anaeromyxobacter</i> sp. Fw109-5           |
| YP_003328486.1 | <i>Anaplasma centrale</i> str. Israel         |
| YP_505026.1    | <i>Anaplasma phagocytophilum</i> HZ           |
| XP_001689093.1 | <i>Anopheles gambiae</i> str. PEST            |
| XP_624465.1    | <i>Apis mellifera</i>                         |
| AAP34327.1     | <i>Aplysia californica</i>                    |
| XP_002874876.1 | <i>Arabidopsis lyrata lyrata</i>              |
| YP_157632.1    | <i>Aromatoleum aromaticum</i> EbN1            |
| CBA72044.1     | <i>Arsenophonus nasoniae</i>                  |
| XP_003017345.1 | <i>Arthroderma benhamiae</i> CBS 112371       |
| EFR03369.1     | <i>Arthroderma gypseum</i> CBS 118893         |
| XP_002845443.1 | <i>Arthroderma otae</i> CBS 113480            |
| ZP_03271485.1  | <i>Arthrospira maxima</i> CS-328              |
| NP_986695.1    | <i>Ashbya gossypii</i> ATCC 10895             |
| XP_001269417.1 | <i>Aspergillus clavatus</i> NRRL 1            |
| XP_750494.1    | <i>Aspergillus fumigatus</i> Af293            |
| CBF80916.1     | <i>Aspergillus nidulans</i> FGSC A4           |
| XP_001392079.1 | <i>Aspergillus niger</i>                      |
| XP_001727930.1 | <i>Aspergillus oryzae</i> RIB40               |
| XP_001209481.1 | <i>Aspergillus terreus</i> NIH2624            |
| ZP_04771357.1  | <i>Asticcacaulis excentricus</i> CB 48        |
| ZP_01226211.1  | <i>Aurantimonas manganooxydans</i> SI85-9A1   |
| YP_934399.1    | <i>Azoarcus</i> sp. BH72                      |
| YP_001526419.1 | <i>Azorhizobium caulinodans</i> ORS 571       |
| YP_003452324.1 | <i>Azospirillum</i> sp. B510                  |
| YP_002797265.1 | <i>Azotobacter vinelandii</i> DJ              |
| CBW26108.1     | <i>Bacteriovorax marinus</i> SJ               |
| ZP_02000362.1  | <i>Beggiatoa</i> sp. PS                       |
| YP_001831208.1 | <i>Beijerinckia indica indica</i> ATCC 9039   |
| NP_001040239.1 | <i>Bombyx mori</i>                            |
| YP_786724.1    | <i>Bordetella avium</i> 197N                  |
| NP_884655.1    | <i>Bordetella parapertussis</i> 12822         |
| NP_880948.1    | <i>Bordetella pertussis</i> Tohama I          |
| YP_001631711.1 | <i>Bordetella petrii</i> DSM 12804            |
| NP_001179322.1 | <i>Bos taurus</i>                             |
| NP_769121.1    | <i>Bradyrhizobium japonicum</i> USDA 110      |
| YP_001238378.1 | <i>Bradyrhizobium</i> sp. BTAi1               |
| YP_001204071.1 | <i>Bradyrhizobium</i> sp. ORS278              |
| ZP_05033661.1  | <i>Brevundimonas</i> sp. BAL3                 |
| YP_003819662.1 | <i>Brevundimonas subvibrioides</i> ATCC 15264 |
| YP_001628208.1 | <i>Brucella suis</i> ATCC 23445               |
| YP_001808908.1 | <i>Burkholderia ambifaria</i> MC40-6          |
| YP_002912416.1 | <i>Burkholderia glumae</i> BGR1               |
| ZP_02882884.1  | <i>Burkholderia graminis</i> C4D1M            |
| YP_001858290.1 | <i>Burkholderia phymatum</i> STM815           |
| YP_004029856.1 | <i>Burkholderia rhizoxinica</i> HKI 454       |
| ZP_02387100.1  | <i>Burkholderia thailandensis</i> Bt4         |
| ZP_02378303.1  | <i>Burkholderia ubonensis</i> Bu              |
| XP_002758917.1 | <i>Callithrix jacchus</i>                     |
| EFN65629.1     | <i>Camponotus floridanus</i>                  |

|                |                                                                             |
|----------------|-----------------------------------------------------------------------------|
| XP_711014.1    | <i>Candida albicans</i> SC5314                                              |
| XP_002419319.1 | <i>Candida dubliniensis</i> CD36                                            |
| XP_448741.1    | <i>Candida glabrata</i> CBS 138                                             |
| XP_002548314.1 | <i>Candida tropicalis</i> MYA-3404                                          |
| YP_003166069.1 | <i>Candidatus</i> Accumulibacter phosphatis clade IIA str. UW-1             |
| ABV27411.1     | <i>Candidatus</i> Chloracidobacterium thermophilum                          |
| YP_002924060.1 | <i>Candidatus</i> Hamiltonella defensa 5AT ( <i>Acyrtosiphon pisum</i> )    |
| YP_003065486.1 | <i>Candidatus</i> Liberibacter asiaticus str. psy62                         |
| ADR52468.1     | <i>Candidatus</i> Liberibacter solanacearum CLso-ZC1                        |
| ZP_05068735.1  | <i>Candidatus</i> Pelagibacter sp. HTCC7211                                 |
| YP_265529.1    | <i>Candidatus</i> Pelagibacter ubique HTCC1062                              |
| YP_008974.1    | <i>Candidatus</i> Protochlamydia amoebophila UWE25                          |
| YP_003552513.1 | <i>Candidatus</i> Puniceispirillum marinum IMCC1322                         |
| ZP_07396073.1  | <i>Candidatus</i> Regiella insecticola LSR1                                 |
| YP_903722.1    | <i>Candidatus</i> Ruthia magnifica str. Cm ( <i>Calyptogena magnifica</i> ) |
| YP_001219299.1 | <i>Candidatus</i> Vesicomysocius okutanii HA                                |
| XP_545070.2    | <i>Canis familiaris</i>                                                     |
| ZP_05705596.1  | <i>Cardiobacterium hominis</i> ATCC 15826                                   |
| NP_419325.1    | <i>Caulobacter crescentus</i> CB15                                          |
| YP_003591524.1 | <i>Caulobacter segnis</i> ATCC 21756                                        |
| YP_001984040.1 | <i>Cellvibrio japonicus</i> Ueda107                                         |
| XP_001225650.1 | <i>Chaetomium globosum</i> CBS 148.51                                       |
| YP_003126108.1 | <i>Chitinophaga pinensis</i> DSM 2588                                       |
| XP_001701729.1 | <i>Chlamydomonas reinhardtii</i>                                            |
| XP_001701791.1 | <i>Chlamydomonas reinhardtii</i>                                            |
| EFN57674.1     | <i>Chlorella variabilis</i>                                                 |
| EFN53355.1     | <i>Chlorella variabilis</i>                                                 |
| YP_002462638.1 | <i>Chloroflexus aggregans</i> DSM 9485                                      |
| NP_900427.1    | <i>Chromobacterium violaceum</i> ATCC 12472                                 |
| YP_574908.1    | <i>Chromohalobacter salexigens</i> DSM 3043                                 |
| XP_002131844.1 | <i>Ciona intestinalis</i>                                                   |
| ZP_05782630.1  | <i>Citreicella</i> sp. SE45                                                 |
| YP_001451949.1 | <i>Citrobacter koseri</i> ATCC BAA-895                                      |
| YP_003365934.1 | <i>Citrobacter rodentium</i> ICC168                                         |
| ZP_04562911.1  | <i>Citrobacter</i> sp. 30_2                                                 |
| ZP_06351912.1  | <i>Citrobacter youngae</i> ATCC 29220                                       |
| ZP_06861256.1  | <i>Citromicrobium bathyomarinum</i> JL354                                   |
| XP_002615716.1 | <i>Clavispora lusitaniae</i> ATCC 42720                                     |
| XP_001248739.1 | <i>Coccidioides immitis</i> RS                                              |
| YP_270654.1    | <i>Colwellia psychrerythraea</i> 34H                                        |
| YP_003278939.1 | <i>Comamonas testosteroni</i> CNB-2                                         |
| ZP_01103085.1  | <i>Congregibacter litoralis</i> KT71                                        |
| XP_001831724.1 | <i>Coprinopsis cinerea</i> okayama7#130                                     |
| YP_003547458.1 | <i>Coraliomargarita akajimensis</i> DSM 45221                               |
| NP_820710.2    | <i>Coxiella burnetii</i> RSA 493                                            |
| YP_003715487.1 | <i>Croceibacter atlanticus</i> HTCC2559                                     |
| ZP_00515789.1  | <i>Crocospaera watsonii</i> WH 8501                                         |
| YP_001436926.1 | <i>Cronobacter sakazakii</i> ATCC BAA-894                                   |
| XP_571169.1    | <i>Cryptococcus neoformans</i> var. neoformans JEC21                        |
| XP_001847646.1 | <i>Culex quinquefasciatus</i>                                               |
| YP_582938.1    | <i>Cupriavidus metallidurans</i> CH34                                       |
| YP_002004893.1 | <i>Cupriavidus taiwanensis</i>                                              |
| CBA26360.1     | <i>Curvibacter</i> putative symbiont of <i>Hydra magnipapillata</i>         |

|                |                                                         |
|----------------|---------------------------------------------------------|
| ZP_05044031.1  | <i>Cyanobium</i> sp. PCC 7001                           |
| ZP_01727119.1  | <i>Cyanothece</i> sp. CCY0110                           |
| YP_002482619.1 | <i>Cyanothece</i> sp. PCC 7425                          |
| YP_003887027.1 | <i>Cyanothece</i> sp. PCC 7822                          |
| YP_002371374.1 | <i>Cyanothece</i> sp. PCC 8801                          |
| ZP_06309389.1  | <i>Cylindrospermopsis raciborskii</i> CS-505            |
| YP_678526.1    | <i>Cytophaga hutchinsonii</i> ATCC 33406                |
| CAK04614.2     | <i>Danio rerio</i>                                      |
| XP_461074.1    | <i>Debaryomyces hansenii</i> CBS767                     |
| YP_286868.1    | <i>Dechloromonas aromatica</i> RCB                      |
| YP_001564544.1 | <i>Delftia acidovorans</i> SPH-1                        |
| YP_003332374.1 | <i>Dickeya dadantii</i> Ech586                          |
| YP_003005588.1 | <i>Dickeya zeae</i> Ech1591                             |
| XP_636472.1    | <i>Dictyostelium discoideum</i> AX4                     |
| YP_001532021.1 | <i>Dinoroseobacter shibae</i> DFL 12                    |
| ZP_01049608.1  | <i>Dokdonia donghaensis</i> MED134                      |
| XP_001962390.1 | <i>Drosophila ananassae</i>                             |
| XP_001992983.1 | <i>Drosophila grimshawi</i>                             |
| NP_524777.1    | <i>Drosophila melanogaster</i>                          |
| XP_002003102.1 | <i>Drosophila mojavensis</i>                            |
| XP_001355783.1 | <i>Drosophila pseudoobscura pseudoobscura</i>           |
| XP_002078453.1 | <i>Drosophila simulans</i>                              |
| XP_002052468.1 | <i>Drosophila virilis</i>                               |
| XP_002066428.1 | <i>Drosophila willistoni</i>                            |
| YP_003086752.1 | <i>Dyadobacter fermentans</i> DSM 18053                 |
| CBN73780.1     | <i>Ectocarpus siliculosus</i>                           |
| CBJ29596.1     | <i>Ectocarpus siliculosus</i>                           |
| ZP_06713957.1  | <i>Edwardsiella tarda</i> ATCC 23685                    |
| YP_303084.1    | <i>Ehrlichia canis</i> str. Jake                        |
| YP_507402.1    | <i>Ehrlichia chaffeensis</i> str. Arkansas              |
| YP_196393.1    | <i>Ehrlichia ruminantium</i> str. Gardel                |
| ZP_05619665.1  | <i>Enhydrobacter aerosaccus</i> SK60                    |
| ZP_05968627.1  | <i>Enterobacter cancerogenus</i> ATCC 35316             |
| YP_003940871.1 | <i>Enterobacter cloacae</i> SCF1                        |
| CAZ90522.1     | <i>Enterobacter turicensis</i>                          |
| XP_001502354.2 | <i>Equus caballus</i>                                   |
| YP_003531857.1 | <i>Erwinia amylovora</i> CFBP1430                       |
| YP_003742683.1 | <i>Erwinia billingiae</i> Eb661                         |
| YP_001907028.1 | <i>Erwinia tasmaniensis</i> Et1/99                      |
| YP_458773.1    | <i>Erythrobacter litoralis</i> HTCC2594                 |
| ZP_01863945.1  | <i>Erythrobacter</i> sp. SD-21                          |
| ZP_02901842.1  | <i>Escherichia albertii</i> TW07627                     |
| YP_003911319.1 | <i>Ferrimonas balearica</i> DSM 9799                    |
| ZP_01733825.1  | Flavobacteria bacterium BAL38                           |
| ZP_01201439.1  | Flavobacteria bacterium BBFL7                           |
| ZP_03702571.1  | Flavobacteria bacterium MS024-2A                        |
| ZP_03700872.1  | Flavobacteria bacterium MS024-3C                        |
| ZP_02181448.1  | Flavobacteriales bacterium ALC-1                        |
| YP_003861950.1 | Flavobacteriales bacterium HTCC2170                     |
| YP_001193303.1 | <i>Flavobacterium johnsoniae</i> UW101                  |
| YP_001294977.1 | <i>Flavobacterium psychrophilum</i> JIP02/86            |
| ZP_04756187.1  | <i>Francisella philomiragia philomiragia</i> ATCC 25015 |
| YP_763529.1    | <i>Francisella tularensis holarctica</i> OSU18          |

|                |                                                |
|----------------|------------------------------------------------|
| ZP_01437668.1  | <i>Fulvimarina pelagi</i> HTCC2506             |
| YP_003848417.1 | <i>Gallionella capsiferriformans</i> ES-2      |
| XP_416596.1    | <i>Gallus gallus</i>                           |
| ZP_05128028.1  | gamma proteobacterium NOR5-3                   |
| ZP_04956597.1  | gamma proteobacterium NOR51-B                  |
| ZP_02736979.1  | <i>Gemmata obscuriglobus</i> UQM 2246          |
| YP_002760648.1 | <i>Gemmatimonas aurantiaca</i> T-27            |
| XP_390915.1    | <i>Gibberella zeae</i> PH-1                    |
| ZP_03561580.1  | <i>Glaciecola</i> sp. HTCC2999                 |
| NP_926822.1    | <i>Gloeobacter violaceus</i> PCC 7421          |
| EFQ32913.1     | <i>Glomerella graminicola</i> M1.001           |
| EFQ34236.1     | <i>Glomerella graminicola</i> M1.001           |
| ADD19859.1     | <i>Glossina morsitans morsitans</i>            |
| YP_001602303.1 | <i>Gluconacetobacter diazotrophicus</i> PAI 5  |
| ZP_06833757.1  | <i>Gluconacetobacter hansenii</i> ATCC 23769   |
| YP_192290.1    | <i>Gluconobacter oxydans</i> 621H              |
| P35055.1       | <i>Glycine max</i>                             |
| YP_863238.1    | <i>Gramella forsetii</i> KT0803                |
| YP_745543.1    | <i>Granulibacter bethesdensis</i> CGDNIH1      |
| ZP_06050889.1  | <i>Grimontia hollisae</i> CIP 101886           |
| ABD51922.1     | <i>Guillardia theta</i>                        |
| YP_431382.1    | <i>Hahella chejuensis</i> KCTC 2396            |
| YP_003896447.1 | <i>Halomonas elongata</i> DSM 2581             |
| YP_001003885.1 | <i>Halorhodospira halophila</i> SL1            |
| YP_003263957.1 | <i>Halothiobacillus neapolitanus</i> c2        |
| EFN81420.1     | <i>Harpegnathos saltator</i>                   |
| YP_003776946.1 | <i>Herbaspirillum seropedicae</i> SmR1         |
| YP_001098889.1 | <i>Hermiimonas arsenicoxydans</i>              |
| YP_003059131.1 | <i>Hirschia baltica</i> ATCC 49814             |
| ZP_02168689.1  | <i>Hoeflea phototrophica</i> DFL-43            |
| BAA04033.1     | <i>Homo sapiens</i>                            |
| Q42840.1       | <i>Hordeum vulgare</i>                         |
| YP_003756649.1 | <i>Hyphomicrobium denitrificans</i> ATCC 51888 |
| YP_759079.1    | <i>Hyphomonas neptunium</i> ATCC 15444         |
| ZP_01042061.1  | <i>Idiomarina baltica</i> OS145                |
| YP_154416.1    | <i>Idiomarina loihiensis</i> L2TR              |
| ABA55505.1     | <i>Isochrysis galbana</i>                      |
| XP_002406476.1 | <i>Ixodes scapularis</i>                       |
| YP_511790.1    | <i>Jannaschia</i> sp. CCS1                     |
| YP_001352232.1 | <i>Janthinobacterium</i> sp. Marseille         |
| YP_003147787.1 | <i>Kangiella koreensis</i> DSM 16069           |
| YP_003963359.1 | <i>Ketogulonicigenium vulgare</i> Y25          |
| YP_002237218.1 | <i>Klebsiella pneumoniae</i> 342               |
| XP_455911.1    | <i>Kluyveromyces lactis</i> NRRL Y-1140        |
| ZP_02161920.1  | <i>Kordia algicida</i> OT-1                    |
| YP_003384119.1 | <i>Kribbella flavida</i> DSM 17836             |
| ZP_05115343.1  | <i>Labrenzia alexandrii</i> DFL-11             |
| XP_001883701.1 | <i>Laccaria bicolor</i> S238N-H82              |
| XP_002552538.1 | <i>Lachancea thermotolerans</i>                |
| YP_002794719.1 | <i>Laribacter hongkongensis</i> HLHK9          |
| YP_003996846.1 | <i>Leadbetterella byssophila</i> DSM 17132     |
| ZP_01059623.1  | <i>Leeuwenhoekella blandensis</i> MED217       |
| YP_003454795.1 | <i>Legionella longbeachae</i> NSW150           |

YP\_123547.1  
ZP\_01876308.1  
YP\_001790983.1  
ZP\_01914998.1  
XP\_001527171.1  
ZP\_01003942.1  
ZP\_03696669.1  
ZP\_01620260.1  
XP\_001088605.1  
XP\_368183.2  
ZP\_00052048.1  
XP\_001731979.1  
YP\_755965.1  
ZP\_01625673.1  
ZP\_01615626.1  
ZP\_05096563.1  
ZP\_01223348.1  
ZP\_01893383.1  
YP\_957341.1  
ZP\_01076872.1  
YP\_001338938.1  
ZP\_01013122.1  
YP\_004053588.1  
NP\_103997.1  
ZP\_05810785.1  
YP\_674726.1  
YP\_001020536.1  
YP\_544458.1  
ZP\_07652679.1  
YP\_001638156.1  
YP\_002501670.1  
YP\_001757320.1  
YP\_002364048.1  
YP\_115186.1  
ZP\_05104306.1  
ZP\_01552641.1  
YP\_003047838.1  
YP\_003673351.1  
YP\_003050153.1  
ZP\_05026772.1  
ZP\_05027767.1  
YP\_001655684.1  
XP\_003062314.1  
XP\_003064620.1  
ZP\_01686958.1  
XP\_001380630.1  
XP\_001749080.1  
YP\_003627566.1  
ZP\_01900750.1  
ZP\_07746427.1  
AAH17680.2  
YP\_634879.1  
XP\_001603631.1

*Legionella pneumophila* str. Paris  
*Lentisphaera araneosa* HTCC2155  
*Leptothrix cholodnii* SP-6  
*Limnobacter* sp. MED105  
*Lodderomyces elongisporus* NRRL YB-4239  
*Loktanella vestfoldensis* SKA53  
*Lutiella nitroferrum* 2002  
*Lyngbya* sp. PCC 8106  
*Macaca mulatta*  
*Magnaporthe oryzae* 70-15  
*Magnetospirillum magnetotacticum* MS-1  
*Malassezia globosa* CBS 7966  
*Maricaulis maris* MCS10  
marine gamma proteobacterium HTCC2080  
marine gamma proteobacterium HTCC2143  
marine gamma proteobacterium HTCC2148  
marine gamma proteobacterium HTCC2207  
*Marinobacter algicola* DG893  
*Marinobacter aquaeolei* VT8  
*Marinomonas* sp. MED121  
*Marinomonas* sp. MWYL1  
*Maritimibacter alkaliphilus* HTCC2654  
*Marivirga tractuosa* DSM 4126  
*Mesorhizobium loti* MAFF303099  
*Mesorhizobium opportunistum* WSM2075  
*Mesorhizobium* sp. BNC1  
*Methylibium petroleiphilum* PM1  
*Methylobacillus flagellatus* KT  
*Methylobacter tundripaludum* SV96  
*Methylobacterium extorquens* PA1  
*Methylobacterium nodulans* ORS 2060  
*Methylobacterium radiotolerans* JCM 2831  
*Methylocella silvestris* BL2  
*Methylococcus capsulatus* str. Bath  
*Methylophaga thiooxidans* DMS010  
*Methylophilales bacterium* HTCC2181  
*Methylotenera mobilis* JLW8  
*Methylotenera* sp. 301  
*Methylovorvus* sp. SIP3-4  
*Microcoleus chthonoplastes* PCC 7420  
*Microcoleus chthonoplastes* PCC 7420  
*Microcystis aeruginosa* NIES-843  
*Micromonas pusilla* CCMP1545  
*Micromonas pusilla* CCMP1545  
*Microscilla marina* ATCC 23134  
*Monodelphis domestica*  
*Monosiga brevicollis* MX1  
*Moraxella catarrhalis* RH4  
*Moritella* sp. PE36  
*Mucilaginibacter paludis* DSM 18603  
*Mus musculus*  
*Myxococcus xanthus* DK 1622  
*Nasonia vitripennis*

|                |                                                       |
|----------------|-------------------------------------------------------|
| XP_003048044.1 | <i>Nectria haematococca</i> mpVI 77-13-4              |
| ZP_06734703.1  | <i>Neisseria elongata glycolytica</i> ATCC 29315      |
| ZP_04758168.1  | <i>Neisseria flavescens</i> SK114                     |
| ZP_05977631.1  | <i>Neisseria mucosa</i> ATCC 25996                    |
| ZP_05319503.1  | <i>Neisseria sicca</i> ATCC 29256                     |
| ZP_06980038.1  | <i>Neisseria sp.</i> oral taxon 014 str. F0314        |
| ZP_05985247.1  | <i>Neisseria subflava</i> NJ9703                      |
| XP_001620068.1 | <i>Nematostella vectensis</i>                         |
| YP_003081649.1 | <i>Neorickettsia risticii</i> str. Illinois           |
| YP_506339.1    | <i>Neorickettsia sennetsu</i> str. Miyayama           |
| XP_001264923.1 | <i>Neosartorya fischeri</i> NRRL 181                  |
| XP_956249.2    | <i>Neurospora crassa</i> OR74A                        |
| Q42946.1       | <i>Nicotiana tabacum</i>                              |
| YP_578441.1    | <i>Nitrobacter hamburgensis</i> X14                   |
| ZP_01045264.1  | <i>Nitrobacter sp.</i> Nb-311A                        |
| YP_319226.1    | <i>Nitrobacter winogradskyi</i> Nb-255                |
| ZP_01126645.1  | <i>Nitrococcus mobilis</i> Nb-231                     |
| YP_003528877.1 | <i>Nitrosococcus halophilus</i> Nc4                   |
| YP_003759555.1 | <i>Nitrosococcus watsoni</i> C-113                    |
| NP_841898.1    | <i>Nitrosomonas europaea</i> ATCC 19718               |
| YP_748151.1    | <i>Nitrosomonas eutropha</i> C91                      |
| ZP_05316517.1  | <i>Nitrosomonas sp.</i> AL212                         |
| YP_410836.1    | <i>Nitrosospora multififormis</i> ATCC 25196          |
| ZP_01629829.1  | <i>Nodularia spumigena</i> CCY9414                    |
| ZP_01632122.1  | <i>Nodularia spumigena</i> CCY9414                    |
| YP_003721629.1 | <i>Nostoc azollae</i> 0708                            |
| YP_001868443.1 | <i>Nostoc punctiforme</i> PCC 73102                   |
| NP_485400.1    | <i>Nostoc sp.</i> PCC 7120                            |
| YP_497806.1    | <i>Novosphingobium aromaticivorans</i> DSM 12444      |
| ZP_02152526.1  | <i>Oceanibulbus indolifex</i> HEL-45                  |
| ZP_00953108.1  | <i>Oceanicaulis alexandrii</i> HTCC2633               |
| ZP_00998616.1  | <i>Oceanicola batsensis</i> HTCC2597                  |
| ZP_01157099.1  | <i>Oceanicola granulosus</i> HTCC2516                 |
| ZP_01306458.1  | <i>Oceanobacter sp.</i> RED65                         |
| ZP_01165249.1  | <i>Oceanospirillum sp.</i> MED92                      |
| YP_001370161.1 | <i>Ochrobactrum anthropi</i> ATCC 49188               |
| ZP_05066868.1  | <i>Octadecabacter antarcticus</i> 238                 |
| CBY19597.1     | <i>Oikopleura dioica</i>                              |
| YP_002289973.1 | <i>Oligotropha carboxidovorans</i> OM5                |
| YP_001819577.1 | <i>Opitutus terrae</i> PB90-1                         |
| YP_001938470.1 | <i>Orientia tsutsugamushi</i> str. Ikeda              |
| XP_001519105.1 | <i>Ornithorhynchus anatinus</i>                       |
| XP_002716787.1 | <i>Oryctolagus cuniculus</i>                          |
| EEE61660.1     | <i>Oryza sativa</i> Japonica Group                    |
| ZP_07111030.1  | <i>Oscillatoria sp.</i> PCC 6506                      |
| XP_001416682.1 | <i>Ostreococcus lucimarinus</i> CCE9901               |
| XP_001422270.1 | <i>Ostreococcus lucimarinus</i> CCE9901               |
| XP_003078228.1 | <i>Ostreococcus tauri</i>                             |
| XP_516615.2    | <i>Pan troglodytes</i>                                |
| YP_003521072.1 | <i>Pantoea ananatis</i> LMG 20103                     |
| YP_003931839.1 | <i>Pantoea vagans</i> C9-1                            |
| ZP_06298692.1  | <i>Parachlamydia acanthamoebae</i> str. Hall's coccus |
| XP_002790127.1 | <i>Paracoccidioides brasiliensis</i> Pb01             |

|                |                                                               |
|----------------|---------------------------------------------------------------|
| YP_915545.1    | <i>Paracoccus denitrificans</i> PD1222                        |
| XP_001449237.1 | <i>Paramecium tetraurelia</i> strain d4-2                     |
| YP_001413511.1 | <i>Parvibaculum lavamentivorans</i> DS-1                      |
| YP_003855304.1 | <i>Parvularcula bermudensis</i> HTCC2503                      |
| YP_002049255.1 | <i>Paulinella chromatophora</i>                               |
| YP_003258417.1 | <i>Pectobacterium wasabiae</i> WPP163                         |
| XP_002425624.1 | <i>Pediculus humanus corporis</i>                             |
| YP_003092428.1 | <i>Pedobacter heparinus</i> DSM 2366                          |
| EFR81638.1     | <i>Pedobacter saltans</i> DSM 12145                           |
| ZP_01882631.1  | <i>Pedobacter</i> sp. BAL39                                   |
| ZP_01444939.1  | <i>Pelagibaca bermudensis</i> HTCC2601                        |
| XP_002557383.1 | <i>Penicillium chrysogenum</i> Wisconsin 54-1255              |
| XP_002149185.1 | <i>Penicillium marneffeii</i> ATCC 18224                      |
| ZP_02144631.1  | <i>Phaeobacter gallaeciensis</i> BS107                        |
| XP_002186510.1 | <i>Phaeodactylum tricornutum</i> CCAP 1055/1                  |
| XP_002182874.1 | <i>Phaeodactylum tricornutum</i> CCAP 1055/1                  |
| XP_002179603.1 | <i>Phaeodactylum tricornutum</i> CCAP 1055/1                  |
| XP_001791922.1 | <i>Phaeosphaeria nodorum</i> SN15                             |
| YP_002131712.1 | <i>Phenylobacterium zucineum</i> HLK1                         |
| ZP_06156466.1  | <i>Photobacterium damsela damsela</i> CIP 102761              |
| YP_131630.1    | <i>Photobacterium profundum</i> SS9                           |
| ZP_01161226.1  | <i>Photobacterium</i> sp. SKA34                               |
| YP_003040230.1 | <i>Photorhabdus asymbiotica</i>                               |
| NP_928683.1    | <i>Photorhabdus luminescens laumondii</i> TTO1                |
| XP_001754127.1 | <i>Physcomitrella patens patens</i>                           |
| XP_001766305.1 | <i>Physcomitrella patens patens</i>                           |
| XP_002997752.1 | <i>Phytophthora infestans</i> T30-4                           |
| ABR16358.1     | <i>Picea sitchensis</i>                                       |
| ADE77306.1     | <i>Picea sitchensis</i>                                       |
| EDK40106.2     | <i>Pichia guilliermondii</i> ATCC 6260                        |
| XP_002493182.1 | <i>Pichia pastoris</i> GS115                                  |
| XP_675246.1    | <i>Plasmodium berghei</i> strain ANKA                         |
| AAZ08394.1     | <i>Plasmodium falciparum</i>                                  |
| XP_725970.1    | <i>Plasmodium yoelii yoelii</i> str. 17XNL                    |
| XP_001909319.1 | <i>Podospora anserina</i> S mat+                              |
| ZP_01117858.1  | <i>Polaribacter irgensii</i> 23-P                             |
| ZP_01052456.1  | <i>Polaribacter</i> sp. MED152                                |
| YP_981964.1    | <i>Polaromonas naphthalenivorans</i> CJ2                      |
| YP_001155398.1 | <i>Polynucleobacter necessarius asymbioticus</i> QLW-P1DMWA-1 |
| YP_001797988.1 | <i>Polynucleobacter necessarius necessarius</i> STIR1         |
| EFA74914.1     | <i>Polysphondylium pallidum</i> PN500                         |
| XP_002813417.1 | <i>Pongo abelii</i>                                           |
| EEF08708.1     | <i>Populus trichocarpa</i>                                    |
| XP_002317199.1 | <i>Populus trichocarpa</i>                                    |
| XP_002472829.1 | <i>Postia placenta</i> Mad-698-R                              |
| YP_001015848.1 | <i>Prochlorococcus marinus</i> str. NATL1A                    |
| YP_002151566.1 | <i>Proteus mirabilis</i> HI4320                               |
| ZP_03803516.1  | <i>Proteus penneri</i> ATCC 35198                             |
| ZP_03318736.1  | <i>Providencia alcalifaciens</i> DSM 30120                    |
| YP_659616.1    | <i>Pseudoalteromonas atlantica</i> T6c                        |
| YP_338586.1    | <i>Pseudoalteromonas haloplanktis</i> TAC125                  |
| ZP_01135228.1  | <i>Pseudoalteromonas tunicata</i> D2                          |
| YP_002437634.1 | <i>Pseudomonas aeruginosa</i> LESB58                          |



|                |                                                            |
|----------------|------------------------------------------------------------|
| YP_605841.1    | <i>Pseudomonas entomophila</i> L48                         |
| YP_002869720.1 | <i>Pseudomonas fluorescens</i> SBW25                       |
| YP_001185566.1 | <i>Pseudomonas mendocina</i> ymp                           |
| ADR57811.1     | <i>Pseudomonas putida</i> BIRD-1                           |
| YP_001170576.1 | <i>Pseudomonas stutzeri</i> A1501                          |
| NP_790029.1    | <i>Pseudomonas syringae</i> pv. tomato str. DC3000         |
| ZP_05083700.1  | <i>Pseudovibrio</i> sp. JE062                              |
| YP_263526.1    | <i>Psychrobacter arcticus</i> 273-4                        |
| YP_579511.1    | <i>Psychrobacter cryohalolentis</i> K5                     |
| ZP_01252416.1  | <i>Psychroflexus torquis</i> ATCC 700755                   |
| EFQ89747.1     | <i>Pyrenophora teres</i> f. teres 0-1                      |
| XP_001934028.1 | <i>Pyrenophora tritici-repentis</i> Pt-1C-BFP              |
| YP_725428.1    | <i>Ralstonia eutropha</i> H16                              |
| YP_296729.1    | <i>Ralstonia eutropha</i> JMP134                           |
| YP_001899956.1 | <i>Ralstonia pickettii</i> 12J                             |
| YP_003751885.1 | <i>Ralstonia solanacearum</i> PSI07                        |
| ZP_06306274.1  | <i>Raphidiopsis brookii</i> D9                             |
| NP_001032172.1 | <i>Rattus norvegicus</i>                                   |
| ZP_01116580.1  | <i>Reinekea</i> sp. MED297                                 |
| YP_001979332.1 | <i>Rhizobium etli</i> CIAT 652                             |
| YP_002282282.1 | <i>Rhizobium leguminosarum</i> bv. trifolii WSM2304        |
| YP_002826197.1 | <i>Rhizobium</i> sp. NGR234                                |
| ZP_05842205.1  | <i>Rhodobacter</i> sp. SW2                                 |
| YP_002526401.1 | <i>Rhodobacter sphaeroides</i> KD131                       |
| ZP_05124303.1  | Rhodobacteraceae bacterium KLH11                           |
| ZP_05076255.1  | Rhodobacterales bacterium HTCC2083                         |
| ZP_01740835.1  | Rhodobacterales bacterium HTCC2150                         |
| YP_523333.1    | <i>Rhodoferrax ferrireducens</i> T118                      |
| YP_004011658.1 | <i>Rhodomicrobium vannielii</i> ATCC 17100                 |
| YP_001990704.1 | <i>Rhodopseudomonas palustris</i> TIE-1                    |
| YP_002299590.1 | <i>Rhodospirillum centenum</i> SW                          |
| YP_003290471.1 | <i>Rhodothermus marinus</i> DSM 4252                       |
| XP_002518396.1 | <i>Ricinus communis</i>                                    |
| YP_538550.1    | <i>Rickettsia bellii</i> RML369-C                          |
| ZP_04698378.1  | <i>Rickettsia</i> endosymbiont of <i>Ixodes scapularis</i> |
| YP_247412.1    | <i>Rickettsia felis</i> URRWXCal2                          |
| YP_067807.1    | <i>Rickettsia typhi</i> str. Wilmington                    |
| ZP_02062580.1  | <i>Rickettsiella grylli</i>                                |
| YP_003194207.1 | <i>Robiginitalea biformata</i> HTCC2501                    |
| ZP_07659502.1  | <i>Roseibium</i> sp. TrichSKD4                             |
| YP_681614.1    | <i>Roseobacter denitrificans</i> OCh 114                   |
| ZP_02141385.1  | <i>Roseobacter litoralis</i> Och 149                       |
| ZP_01902436.1  | <i>Roseobacter</i> sp. AzwK-3b                             |
| ZP_01749205.1  | <i>Roseobacter</i> sp. CCS2                                |
| ZP_05100664.1  | <i>Roseobacter</i> sp. GAI101                              |
| ZP_01057676.1  | <i>Roseobacter</i> sp. MED193                              |
| ZP_01756322.1  | <i>Roseobacter</i> sp. SK209-2-6                           |
| ZP_06898807.1  | <i>Roseomonas cervicalis</i> ATCC 49957                    |
| ZP_00959751.1  | <i>Roseovarius nubinhibens</i> ISM                         |
| ZP_01878086.1  | <i>Roseovarius</i> sp. TM1035                              |
| YP_168848.1    | <i>Ruegeria pomeroyi</i> DSS-3                             |
| ZP_05087730.1  | <i>Ruegeria</i> sp. R11                                    |
| NP_010329.1    | <i>Saccharomyces cerevisiae</i> S288c                      |

YP\_525501.1  
 XP\_002730678.1  
 ZP\_01747867.1  
 YP\_003571828.1  
 ACI33288.1  
 YP\_001569509.1  
 XP\_001386432.1  
 CAX72893.1  
 XP\_002578608.1  
 XP\_003032760.1  
 XP\_002176014.1  
 NP\_593150.1  
 XP\_001597409.1  
 XP\_002990281.1  
 ZP\_06191243.1  
 YP\_001479690.1  
 YP\_925932.1  
 YP\_001095854.1  
 YP\_404179.1  
 YP\_003522925.1  
 ZP\_05786416.1  
 ZP\_05741168.1  
 YP\_001327226.1  
 NP\_385933.1  
 YP\_455392.1  
 CBI53059.1  
 XP\_002447075.1  
 XP\_002445217.1  
 ZP\_03966656.1  
 ZP\_07573676.1  
 YP\_003546501.1  
 YP\_001261900.1  
 YP\_616394.1  
 YP\_003387114.1  
 ZP\_01549351.1  
 YP\_003694395.1  
 YP\_001974217.1  
 ZP\_01465041.1  
 XP\_001191557.1  
 ZP\_00954066.1  
 XP\_003132767.1  
 YP\_171565.1  
 YP\_474336.1  
 YP\_001735072.1  
 ZP\_05035281.1  
 YP\_001224184.1  
 NP\_898131.1  
 NP\_440183.1  
 XP\_002190683.1  
 XP\_002484998.1  
 YP\_003071738.1  
 XP\_001031962.1  
 CAG08052.1

*Saccharophagus degradans* 2-40  
*Saccoglossus kowalevskii*  
*Sagittula stellata* E-37  
*Salinibacter ruber* M8  
*Salmo salar*  
*Salmonella enterica arizonae* serovar 62:z4,z23:-- str. RSK2980  
*Scheffersomyces stipitis* CBS 6054  
*Schistosoma japonicum*  
*Schistosoma mansoni*  
*Schizophyllum commune* H4-8  
*Schizosaccharomyces japonicus* yFS275  
*Schizosaccharomyces pombe* 972h-  
*Sclerotinia sclerotiorum* 1980  
*Selaginella moellendorffii*  
*Serratia odorifera* 4Rx13  
*Serratia proteamaculans* 568  
*Shewanella amazonensis* SB2B  
*Shewanella loihica* PV-4  
*Shigella dysenteriae* Sd197  
*Sideroxydans lithotrophicus* ES-1  
*Silicibacter lacuscaerulensis* ITI-1157  
*Silicibacter* sp. TrichCH4B  
*Sinorhizobium medicae* WSM419  
*Sinorhizobium meliloti* 1021  
*Sodalis glossinidius* str. 'morsitans'  
*Sordaria macrospora*  
*Sorghum bicolor*  
*Sorghum bicolor*  
*Sphingobacterium spiritivorum* ATCC 33300  
*Sphingobium chlorophenolicum* L-1  
*Sphingobium japonicum* UT26S  
*Sphingomonas wittichii* RW1  
*Sphingopyxis alaskensis* RB2256  
*Spirosoma linguale* DSM 74  
*Stappia aggregata* IAM 12614  
*Starkeya novella* DSM 506  
*Stenotrophomonas maltophilia* K279a  
*Stigmatella aurantiaca* DW4/3-1  
*Strongylocentrotus purpuratus*  
*Sulfitobacter* sp. EE-36  
*Sus scrofa*  
*Synechococcus elongatus* PCC 6301  
*Synechococcus* sp. JA-3-3Ab  
*Synechococcus* sp. PCC 7002  
*Synechococcus* sp. PCC 7335  
*Synechococcus* sp. WH 7803  
*Synechococcus* sp. WH 8102  
*Synechocystis* sp. PCC 6803  
*Taeniopygia guttata*  
*Talaromyces stipitatus* ATCC 10500  
*Teredinibacter turnerae* T7901  
*Tetrahymena thermophila*  
*Tetraodon nigroviridis*

ZP\_05341965.1 *Thalassioibium* sp. R2A62  
 ZP\_05342454.1 *Thalassioibium* sp. R2A62  
 XP\_002287097.1 *Thalassiosira pseudonana* CCMP1335  
 XP\_002294357.1 *Thalassiosira pseudonana* CCMP1335  
 YP\_002355096.1 *Thauera* sp. MZ1T  
 NP\_681473.1 *Thermosynechococcus elongatus* BP-1  
 YP\_003461505.1 *Thioalkalivibrio* sp. K90mix  
 YP\_316219.1 *Thiobacillus denitrificans* ATCC 25259  
 YP\_390288.1 *Thiomicrospira crunogena* XCL-2  
 YP\_003644034.1 *Thiomonas intermedia* K12  
 XP\_002370089.1 *Toxoplasma gondii* ME49  
 EEZ98060.1 *Tribolium castaneum*  
 ACB56643.1 *Trichoderma aureoviride*  
 YP\_721000.1 *Trichodesmium erythraeum* IMS101  
 XP\_003024735.1 *Trichophyton verrucosum* HKI 0517  
 XP\_002111571.1 *Trichoplax adhaerens*  
 XP\_002118953.1 *Trichoplax adhaerens*  
 YP\_003703904.1 *Truepera radiovictrix* DSM 17093  
 XP\_002836050.1 *Tuber melanosporum* Mel28  
 XP\_002543691.1 *Uncinocarpus reesii* 1704  
 ADI17025.1 uncultured Vibrionales bacterium HF0010\_22E23  
 ZP\_01889302.1 unidentified eubacterium SCB49  
 XP\_758464.1 *Ustilago maydis* 521  
 XP\_001644528.1 *Vanderwaltozyma polyspora* DSM 70294  
 YP\_002944576.1 *Variovorax paradoxus* S110  
 YP\_998963.1 *Verminephrobacter eiseniae* EF01-2  
 ZP\_05057531.1 Verrucomicrobiae bacterium DG1235  
 XP\_003006045.1 *Verticillium albo-atrum* VaMs.102  
 ZP\_01236983.1 *Vibrio angustum* S14  
 YP\_002808843.1 *Vibrio cholerae* M66-2  
 ZP\_05883922.1 *Vibrio coralliilyticus* ATCC BAA-450  
 ZP\_05880024.1 *Vibrio furnissii* CIP 102972  
 ZP\_06176981.1 *Vibrio harveyi* 1DA3  
 ZP\_05883493.1 *Vibrio metschnikovii* CIP 69.14  
 ZP\_05119392.1 *Vibrio parahaemolyticus* 16  
 ZP\_01868698.1 *Vibrio shilonii* AK1  
 ZP\_00992206.1 *Vibrio splendidus* 12B01  
 NP\_760016.1 *Vibrio vulnificus* CMCP6  
 CAN76809.1 *Vitis vinifera*  
 XP\_002947376.1 *Volvox carteri* f. nagariensis  
 XP\_002946372.1 *Volvox carteri* f. nagariensis  
 YP\_003710114.1 *Waddlia chondrophila* WSU 86-1044  
 NP\_871587.1 *Wigglesworthia glossinidia* endosymbiont of *Glossina brevipalpis*  
 YP\_001975717.1 *Wolbachia* endosymbiont of *Culex quinquefasciatus* Pel  
 ZP\_00373119.1 *Wolbachia* endosymbiont of *Drosophila ananassae*  
 NP\_966926.1 *Wolbachia* endosymbiont of *Drosophila melanogaster*  
 ZP\_03788199.1 *Wolbachia* endosymbiont of *Muscidifurax uniraptor*  
 YP\_198539.1 *Wolbachia* endosymbiont strain TRS of *Brugia malayi*  
 YP\_001417847.1 *Xanthobacter autotrophicus* Py2  
 YP\_003374652.1 *Xanthomonas albilineans*  
 NP\_644408.1 *Xanthomonas axonopodis* pv. citri str. 306  
 YP\_001905617.1 *Xanthomonas campestris* pv. campestris str. B100  
 ZP\_06705382.1 *Xanthomonas fuscans aurantifolii* str. ICPB 11122

|                |                                                       |
|----------------|-------------------------------------------------------|
| YP_202878.1    | <i>Xanthomonas oryzae</i> pv. <i>oryzae</i> KACC10331 |
| XP_002945148.1 | <i>Xenopus (Silurana) tropicalis</i>                  |
| YP_003468888.1 | <i>Xenorhabdus bovienii</i> SS-2004                   |
| YP_003713496.1 | <i>Xenorhabdus nematophila</i> ATCC 19061             |
| AAF82830.1     | <i>Xylella fastidiosa</i> 9a5c                        |
| XP_504574.1    | <i>Yarrowia lipolytica</i>                            |
| ZP_04620598.1  | <i>Yersinia aldovae</i> ATCC 35236                    |
| ZP_04627904.1  | <i>Yersinia bercovieri</i> ATCC 43970                 |
| YP_001005494.1 | <i>Yersinia enterocolitica enterocolitica</i> 8081    |
| ZP_04631885.1  | <i>Yersinia frederiksenii</i> ATCC 33641              |
| ZP_04635700.1  | <i>Yersinia intermedia</i> ATCC 29909                 |
| ZP_04625682.1  | <i>Yersinia kristensenii</i> ATCC 33638               |
| ZP_04642652.1  | <i>Yersinia mollaretii</i> ATCC 43969                 |
| NP_668771.1    | <i>Yersinia pestis</i> KIM 10                         |
| YP_001400260.1 | <i>Yersinia pseudotuberculosis</i> IP 31758           |
| ZP_04613522.1  | <i>Yersinia rohdei</i> ATCC 43380                     |
| ZP_04617979.1  | <i>Yersinia ruckeri</i> ATCC 29473                    |
| NP_001182775.1 | <i>Zea mays</i>                                       |
| YP_003582666.1 | <i>Zunongwangia profunda</i> SM-A87                   |
| XP_002496228.1 | <i>Zygosaccharomyces rouxii</i>                       |
| ZP_04759917.1  | <i>Zymomonas mobilis mobilis</i> ATCC 10988           |

GenBank accession numbers (except for *C. fasciculata*, which has the TriTrypDB scaffold number and coordinates) in bold typeface were sequenced in this work.
