# Supplementary material for: Identification and Phylogenetic Analysis of Heme Synthesis Genes in Trypanosomatids and Their Bacterial Endosymbionts
Source: PubMed Central journal article supplement (PMC3154472; doi:10.1371/journal.pone.0023518), 2011-08-10
Supplement: pone.0023518.s023.pdf [file pone.0023518.s023.pdf]

| Accession number              | Organism                                                                 |
|-------------------------------|--------------------------------------------------------------------------|
| <b>JF756595</b>               | <i>Candidatus Kinetoplastibacterium crithidii</i>                        |
| <b>JF756594</b>               | <i>Candidatus Kinetoplastibacterium desouzaii</i>                        |
| <b>JF756635</b>               | <i>Angomonas deanei</i> TCC036E                                          |
| <b>JF756634</b>               | <i>Crithidia acanthocephali</i> TCC037E                                  |
| scf7180000114303:25388..26083 | <i>Crithidia fasciculata</i> Cf-C1                                       |
| <b>JF756638</b>               | <i>Endotrypanum schaudinni</i> TCC224                                    |
| XP_001562059.1                | <i>Leishmania braziliensis</i>                                           |
| XP_001463210.1                | <i>Leishmania infantum</i>                                               |
| XP_001680901.1                | <i>Leishmania major</i> Friedlin                                         |
| <b>JF756639</b>               | <i>Leptomonas costaricensis</i> TCC169E                                  |
| <b>JF756633</b>               | <i>Strigomonas culicis</i> TCC012E                                       |
| <b>JF756640</b>               | <i>Strigomonas galati</i> TCC219                                         |
| <b>JF756641</b>               | <i>Strigomonas galati</i> TCC219                                         |
| <b>JF756642</b>               | <i>Strigomonas galati</i> TCC219                                         |
| <b>JF756643</b>               | <i>Strigomonas galati</i> TCC219                                         |
| <b>JF756644</b>               | <i>Strigomonas galati</i> TCC219                                         |
| <b>JF756645</b>               | <i>Strigomonas galati</i> TCC219                                         |
| <b>JF756646</b>               | <i>Strigomonas galati</i> TCC219                                         |
| <b>JF756647</b>               | <i>Strigomonas galati</i> TCC219                                         |
| <b>JF756648</b>               | <i>Strigomonas galati</i> TCC219                                         |
| <b>JF756636</b>               | <i>Strigomonas oncopelti</i> TCC290E                                     |
| <b>JF756637</b>               | <i>Strigomonas oncopelti</i> TCC290E                                     |
| ZP_05630057.1                 | <i>Actinobacillus minor</i> 202                                          |
| YP_003255211.1                | <i>Aggregatibacter actinomycetemcomitans</i> D11S-1                      |
| YP_002264302.1                | <i>Aliivibrio salmonicida</i> LFI1238                                    |
| CBA71816.1                    | <i>Arsenophonus nasoniae</i>                                             |
| YP_002924509.1                | <i>Candidatus Hamiltonella defensa</i> 5AT ( <i>Acyrtosiphon pisum</i> ) |
| ZP_07394781.1                 | <i>Candidatus Regiella insecticola</i> LSR1                              |
| YP_001451798.1                | <i>Citrobacter koseri</i> ATCC BAA-895                                   |
| YP_003367343.1                | <i>Citrobacter rodentium</i> ICC168                                      |
| ZP_04558445.1                 | <i>Citrobacter sp.</i> 30_2                                              |
| ZP_06354352.1                 | <i>Citrobacter youngae</i> ATCC 29220                                    |
| YP_001439743.1                | <i>Cronobacter sakazakii</i> ATCC BAA-894                                |
| YP_003331806.1                | <i>Dickeya dadantii</i> Ech586                                           |
| YP_003006176.1                | <i>Dickeya zeae</i> Ech1591                                              |
| ZP_06716269.1                 | <i>Edwardsiella tarda</i> ATCC 23685                                     |
| ZP_05970968.1                 | <i>Enterobacter cancerogenus</i> ATCC 35316                              |
| YP_003943705.1                | <i>Enterobacter cloacae</i> SCF1                                         |
| YP_001178651.1                | <i>Enterobacter sp.</i> 638                                              |
| YP_003529585.1                | <i>Erwinia amylovora</i> CFBP1430                                        |
| YP_003739639.1                | <i>Erwinia billingiae</i> Eb661                                          |
| YP_002647274.1                | <i>Erwinia pyrifoliae</i> Ep1/96                                         |
| YP_001906204.1                | <i>Erwinia tasmaniensis</i> Et1/99                                       |
| AAA67647.1                    | <i>Escherichia coli</i> str. K-12 substr. MG1655                         |
| YP_003911304.1                | <i>Ferrimonas balearica</i> DSM 9799                                     |
| ZP_06050963.1                 | <i>Grimontia hollisae</i> CIP 101886                                     |
| YP_002241087.1                | <i>Klebsiella pneumoniae</i> 342                                         |
| YP_001340351.1                | <i>Marinomonas sp.</i> MED121                                            |
| YP_003518500.1                | <i>Pantoea ananatis</i> LMG 20103                                        |
| ZP_07380067.1                 | <i>Pantoea sp.</i> aB                                                    |
| ZP_05730718.1                 | <i>Pantoea sp.</i> At-9b                                                 |

|                |                                                                               |
|----------------|-------------------------------------------------------------------------------|
| YP_003933027.1 | <i>Pantoea vagans</i> C9-1                                                    |
| YP_048339.1    | <i>Pectobacterium atrosepticum</i> SCRI1043                                   |
| YP_003261561.1 | <i>Pectobacterium wasabiae</i> WPP163                                         |
| YP_128324.1    | <i>Photobacterium profundum</i> SS9                                           |
| ZP_01161142.1  | <i>Photobacterium</i> sp. SKA34                                               |
| YP_003042698.1 | <i>Photorhabdus asymbiotica</i>                                               |
| NP_931571.1    | <i>Photorhabdus luminescens laumondii</i> TTO1                                |
| YP_002153230.1 | <i>Proteus mirabilis</i> HI4320                                               |
| ZP_03318468.1  | <i>Providencia alcalifaciens</i> DSM 30120                                    |
| ZP_06125601.1  | <i>Providencia rettgeri</i> DSM 1131                                          |
| ZP_05974162.1  | <i>Providencia rustigianii</i> DSM 4541                                       |
| ZP_02958890.1  | <i>Providencia stuartii</i> ATCC 25827                                        |
| ZP_01114933.1  | <i>Reinekea</i> sp. MED297                                                    |
| ZP_06192599.1  | <i>Serratia odorifera</i> 4Rx13                                               |
| YP_001476504.1 | <i>Serratia proteamaculans</i> 568                                            |
| YP_925918.1    | <i>Shewanella amazonensis</i> SB2B                                            |
| YP_001552466.1 | <i>Shewanella baltica</i> OS195                                               |
| ZP_02156419.1  | <i>Shewanella benthica</i> KT99                                               |
| YP_561039.1    | <i>Shewanella denitrificans</i> OS217                                         |
| YP_748718.1    | <i>Shewanella frigidimarina</i> NCIMB 400                                     |
| YP_001672255.1 | <i>Shewanella halifaxensis</i> HAW-EB4                                        |
| YP_001092155.1 | <i>Shewanella loihica</i> PV-4                                                |
| NP_715667.1    | <i>Shewanella oneidensis</i> MR-1                                             |
| YP_001499886.1 | <i>Shewanella pealeana</i> ATCC 700345                                        |
| YP_002309484.1 | <i>Shewanella piezotolerans</i> WP3                                           |
| ZP_01707419.1  | <i>Shewanella putrefaciens</i> 200                                            |
| YP_001471768.1 | <i>Shewanella sediminis</i> HAW-EB3                                           |
| YP_867679.1    | <i>Shewanella</i> sp. ANA-3                                                   |
| YP_961424.1    | <i>Shewanella</i> sp. W3-18-1                                                 |
| YP_003554805.1 | <i>Shewanella violacea</i> DSS12                                              |
| YP_001758421.1 | <i>Shewanella woodyi</i> ATCC 51908                                           |
| YP_312780.1    | <i>Shigella sonnei</i> Ss046                                                  |
| YP_453801.1    | <i>Sodalis glossinidius</i> str. 'morsitans'                                  |
| YP_003072465.1 | <i>Teredinibacter turnerae</i> T7901                                          |
| ZP_06179380.1  | <i>Vibrio alginolyticus</i> 40B                                               |
| ZP_01236905.1  | <i>Vibrio angustum</i> S14                                                    |
| ZP_07742018.1  | <i>Vibrio caribbenthicus</i> ATCC BAA-2122                                    |
| ZP_04409571.1  | <i>Vibrio cholerae</i> TM 11079-80                                            |
| ZP_05883850.1  | <i>Vibrio coralliilyticus</i> ATCC BAA-450                                    |
| ZP_05879944.1  | <i>Vibrio furnissii</i> CIP 102972                                            |
| ZP_06177053.1  | <i>Vibrio harveyi</i> 1DA3                                                    |
| ZP_05883428.1  | <i>Vibrio metschnikovii</i> CIP 69.14                                         |
| ZP_05943245.1  | <i>Vibrio orientalis</i> CIP 102891                                           |
| ZP_05121178.1  | <i>Vibrio parahaemolyticus</i> 16                                             |
| ZP_01870130.1  | <i>Vibrio shilonii</i> AK1                                                    |
| ZP_05927574.1  | <i>Vibrio</i> sp. RC341                                                       |
| ZP_00992840.1  | <i>Vibrio splendidus</i> 12B01                                                |
| NP_759941.1    | <i>Vibrio vulnificus</i> CMCP6                                                |
| ZP_01815878.1  | <i>Vibrionales bacterium</i> SWAT-3                                           |
| NP_871126.1    | <i>Wigglesworthia glossinidia</i> endosymbiont of <i>Glossina brevipalpis</i> |
| YP_003466467.1 | <i>Xenorhabdus bovienii</i> SS-2004                                           |
| YP_003713987.1 | <i>Xenorhabdus nematophila</i> ATCC 19061                                     |
| ZP_04620751.1  | <i>Yersinia aldovae</i> ATCC 35236                                            |

|               |                                          |
|---------------|------------------------------------------|
| ZP_04628380.1 | <i>Yersinia bercovieri</i> ATCC 43970    |
| ZP_04634369.1 | <i>Yersinia frederiksenii</i> ATCC 33641 |
| ZP_04637122.1 | <i>Yersinia intermedia</i> ATCC 29909    |
| ZP_04624653.1 | <i>Yersinia kristensenii</i> ATCC 33638  |
| ZP_04641541.1 | <i>Yersinia mollaretii</i> ATCC 43969    |
| NP_667807.1   | <i>Yersinia pestis</i> Pestoides F       |
| ZP_04612258.1 | <i>Yersinia rohdei</i> ATCC 43380        |
| ZP_04616537.1 | <i>Yersinia ruckeri</i> ATCC 29473       |

GenBank accession numbers (except for *C. fasciculata*, which has the TriTrypDB scaffold number and coordinates) in bold typeface were sequenced in this work. The proteins from *C. K. crithidii* and *C. K. desouzaii* were not used in phylogenetic analyses.
