# Supplementary material for: Identification and Phylogenetic Analysis of Heme Synthesis Genes in Trypanosomatids and Their Bacterial Endosymbionts
Source: PubMed Central journal article supplement (PMC3154472; doi:10.1371/journal.pone.0023518), 2011-08-10
Supplement: pone.0023518.s024.pdf [file pone.0023518.s024.pdf]

| Accession number            | Organism                                                |
|-----------------------------|---------------------------------------------------------|
| <b>JF756597</b>             | <i>Candidatus</i> Kinetoplastibacterium blastocrithidii |
| <b>JF756598</b>             | <i>Candidatus</i> Kinetoplastibacterium crithidii       |
| <b>JF756599</b>             | <i>Candidatus</i> Kinetoplastibacterium galatii         |
| <b>JF756600</b>             | <i>Candidatus</i> Kinetoplastibacterium oncopeltii      |
| <b>JF756651</b>             | <i>Angomonas deanei</i> TCC036E                         |
| <b>JF756650</b>             | <i>Crithidia acanthocephali</i> TCC037E                 |
| scf7180000113895:5000..1164 | <i>Crithidia fasciculata</i> Cf-C1                      |
| <b>JF756653</b>             | <i>Endotrypanum schaudinni</i> TCC224                   |
| <b>JF756655</b>             | <i>Herpetomonas muscarum</i> TCC001E                    |
| XP_001563927.1              | <i>Leishmania braziliensis</i> MHOM/BR/75/M2904         |
| XP_001464815.1              | <i>Leishmania infantum</i> JPCM5                        |
| XP_001682405                | <i>Leishmania major</i> Friedlin                        |
| <b>JF756654</b>             | <i>Leptomonas costaricensis</i> TCC169E                 |
| <b>JF756658</b>             | <i>Parabodo caudatus</i> ATCC30905                      |
| <b>JF756656</b>             | <i>Phytomonas</i> sp. Jma TCC066                        |
| <b>JF756649</b>             | <i>Strigomonas culicis</i> TCC012E                      |
| <b>JF756657</b>             | <i>Strigomonas galati</i> TCC219                        |
| <b>JF756652</b>             | <i>Strigomonas oncopelti</i> TCC290E                    |
| YP_003189026.1              | <i>Acetobacter pasteurianus</i> IFO 3283-01             |
| ZP_06686166.1               | <i>Achromobacter piechaudii</i> ATCC 43553              |
| YP_003977224                | <i>Achromobacter xylosoxidans</i> A8                    |
| YP_002218819.1              | <i>Acidithiobacillus ferrooxidans</i> ATCC 53993        |
| YP_002755471.1              | <i>Acidobacterium capsulatum</i> ATCC 51196             |
| YP_873165.1                 | <i>Acidothermus cellulolyticus</i> 11B                  |
| ZP_04764699.1               | <i>Acidovorax delafieldii</i> 2AN                       |
| ZP_04660195.1               | <i>Acinetobacter baumannii</i> AB900                    |
| ZP_05629556.1               | <i>Actinobacillus minor</i> 202                         |
| ZP_03924685.1               | <i>Actinomyces coleocanis</i> DSM 15436                 |
| ZP_07361040.1               | <i>Actinomyces viscosus</i> C505                        |
| YP_001141652.1              | <i>Aeromonas salmonicida salmonicida</i> A449           |
| ZP_07025363.1               | <i>Afipia</i> sp. 1NLS2                                 |
| YP_003256160.1              | <i>Aggregatibacter actinomycetemcomitans</i> D11S-1     |
| YP_002545610.1              | <i>Agrobacterium radiobacter</i> K84                    |
| YP_002550680                | <i>Agrobacterium vitis</i> S4                           |
| ZP_07375331.1               | <i>Ahrensia</i> sp. R2A130                              |
| YP_692014.1                 | <i>Alcanivorax borkumensis</i> SK2                      |
| ZP_07722431.1               | <i>Algoriphagus</i> sp. PR1                             |
| ZP_07020298.1               | <i>Alicyclophilus denitrificans</i> BC                  |
| ZP_03493091.1               | <i>Alicyclobacillus acidocaldarius</i> LAA1             |
| YP_002262324.1              | <i>Aliivibrio salmonicida</i> LF11238                   |
| YP_741581.1                 | <i>Alkalilimnicola ehrlichii</i> MLHE-1                 |
| YP_003442400.1              | <i>Allochromatium vinosum</i> DSM 180                   |
| YP_002124966.1              | <i>Alteromonas macleodii</i> 'Deep ecotype'             |
| YP_002316621.1              | <i>Anoxybacillus flavithermus</i> WK1                   |
| NP_213646.1                 | <i>Aquifex aeolicus</i> VF5                             |
| NP_001031941.1              | <i>Arabidopsis thaliana</i>                             |
| YP_003697464.1              | <i>Arcanobacterium haemolyticum</i> DSM 20595           |
| YP_159744.1                 | <i>Aromatoleum aromaticum</i> EbN1                      |
| CBA71691.1                  | <i>Arsenophonus nasoniae</i>                            |
| YP_003917338.1              | <i>Arthrobacter arilaitensis</i> Re117                  |
| XP_001396807.1              | <i>Aspergillus niger</i> CBS 513.88                     |

|                |                                                                             |
|----------------|-----------------------------------------------------------------------------|
| ZP_01226804.1  | <i>Aurantimonas manganoxydans</i> SI85-9A1                                  |
| YP_934086.1    | <i>Azoarcus</i> sp. BH72                                                    |
| YP_001527188.1 | <i>Azorhizobium caulinodans</i> ORS 571                                     |
| YP_002801245.1 | <i>Azotobacter vinelandii</i> DJ                                            |
| ZP_06365251.1  | <i>Bacillus cellulosilyticus</i> DSM 2522                                   |
| YP_004207023.1 | <i>Bacillus subtilis</i> BSn5                                               |
| CBW26948.1     | <i>Bacteriovorax marinus</i> SJ                                             |
| NP_970190.1    | <i>Bdellovibrio bacteriovorus</i> HD100                                     |
| ZP_02002886.1  | <i>Beggiatoa</i> sp. PS                                                     |
| YP_001834522.1 | <i>Beijerinckia indica indica</i> ATCC 9039                                 |
| ZP_01088523.1  | <i>Blastopirellula marina</i> DSM 3645                                      |
| YP_787218.1    | <i>Bordetella avium</i> 197N                                                |
| NP_890472.1    | <i>Bordetella bronchiseptica</i> RB50                                       |
| NP_885649.1    | <i>Bordetella parapertussis</i> 12822                                       |
| NP_881130.1    | <i>Bordetella pertussis</i> Tohama I                                        |
| YP_001630161.1 | <i>Bordetella petrii</i> DSM 12804                                          |
| NP_776479.1    | <i>Bos taurus</i>                                                           |
| NP_774392.1    | <i>Bradyrhizobium japonicum</i> USDA 110                                    |
| YP_002771296.1 | <i>Brevibacillus brevis</i> NBRC 100599                                     |
| AAK14798.1     | <i>Brucella abortus</i>                                                     |
| YP_001807376.1 | <i>Burkholderia ambifaria</i> MC40-6                                        |
| YP_003165780.1 | <i>Candidatus Accumulibacter phosphatis</i> clade IIA str. UW-1             |
| YP_002923123.1 | <i>Candidatus Hamiltonella defensa</i> 5AT ( <i>Acyrtosiphon pisum</i> )    |
| YP_003064613.1 | <i>Candidatus Liberibacter asiaticus</i> str. psy62                         |
| EFD93161.1     | <i>Candidatus Parvarchaeum acidophilus</i> ARMAN-5                          |
| YP_008556.1    | <i>Candidatus Protochlamydia amoebophila</i> UWE25                          |
| YP_003550405.1 | <i>Candidatus Puniceispirillum marinum</i> IMCC1322                         |
| ZP_07396246.1  | <i>Candidatus Regiella insecticola</i> LSR1                                 |
| YP_903747.1    | <i>Candidatus Ruthia magnifica</i> str. Cm ( <i>Calyptogena magnifica</i> ) |
| YP_001219321.1 | <i>Candidatus Vesicomysocius okutanii</i> HA                                |
| ZP_04057978.1  | <i>Capnocytophaga gingivalis</i> ATCC 33624                                 |
| ZP_05704189.1  | <i>Cardiobacterium hominis</i> ATCC 15826                                   |
| YP_003112386.1 | <i>Catenulispora acidiphila</i> DSM 44928                                   |
| ZP_04450425.1  | <i>Catonella morbi</i> ATCC 51271                                           |
| YP_001984113.1 | <i>Cellvibrio japonicus</i> Ueda107                                         |
| YP_003126103.1 | <i>Chitinophaga pinensis</i> DSM 2588                                       |
| EFN54521.1     | <i>Chlorella variabilis</i>                                                 |
| NP_902150.1    | <i>Chromobacterium violaceum</i> ATCC 12472                                 |
| YP_572953.1    | <i>Chromohalobacter salexigens</i> DSM 3043                                 |
| ZP_07086081.1  | <i>Chryseobacterium gleum</i> ATCC 35910                                    |
| ZP_05782783.1  | <i>Citricella</i> sp. SE45                                                  |
| YP_003364167.1 | <i>Citrobacter rodentium</i> ICC168                                         |
| ZP_06861135.1  | <i>Citromicrobium bathyomarinum</i> JL354                                   |
| YP_267788.1    | <i>Colwellia psychrerythraea</i> 34H                                        |
| YP_003277282.1 | <i>Comamonas testosteroni</i> CNB-2                                         |
| ZP_01102046.1  | <i>Congregibacter litoralis</i> KT71                                        |
| YP_003549603.1 | <i>Coralimargarita akajimensis</i> DSM 45221                                |
| NP_939632.1    | <i>Corynebacterium diphtheriae</i> NCTC 13129                               |
| NP_819097.2    | <i>Coxiella burnetii</i> RSA 493                                            |
| YP_003715496.1 | <i>Croceibacter atlanticus</i> HTCC2559                                     |
| YP_001438854.1 | <i>Cronobacter sakazakii</i> ATCC BAA-894                                   |
| YP_003151035.1 | <i>Cryptobacterium curtum</i> DSM 15641                                     |
| XP_003194818.1 | <i>Cryptococcus gattii</i> WM276                                            |

YP\_002005146.1 *Cupriavidus taiwanensis*  
 CBA32822.1 *Curvibacter* putative symbiont of *Hydra magnipapillata*  
 ZP\_05044143.1 *Cyanobium* sp. PCC 7001  
 YP\_001803982.1 *Cyanothece* sp. ATCC 51142  
 YP\_680066.1 *Cytophaga hutchinsonii* ATCC 33406  
 NP\_571706.1 *Danio rerio*  
 YP\_284155.1 *Dechloromonas aromatica* RCB  
 NP\_294855.1 *Deinococcus radiodurans* R1  
 YP\_001563585.1 *Delftia acidovorans* SPH-1  
 YP\_003691237.1 *Desulfurivibrio alkaliphilus* AHT2  
 YP\_001210125.1 *Dichelobacter nodosus* VCS1703A  
 YP\_003332655.1 *Dickeya dadantii* Ech586  
 YP\_001534832.1 *Dinoroseobacter shibae* DFL 12  
 ZP\_01049599.1 *Dokdonia donghaensis* MED134  
 XP\_002070617.1 *Drosophila willistoni*  
 YP\_003088784.1 *Dyadobacter fermentans* DSM 18053  
 ZP\_06713857.1 *Edwardsiella tarda* ATCC 23685  
 YP\_003181918.1 *Eggerthella lenta* DSM 2243  
 ZP\_03712668.1 *Eikenella corrodens* ATCC 23834  
 ZP\_05621008.1 *Enhydrobacter aerosaccus* SK60  
 YP\_003942844.1 *Enterobacter cloacae* SCF1  
 ZP\_05563472.1 *Enterococcus faecalis* DS5  
 YP\_003739199.1 *Erwinia billingiae* Eb661  
 YP\_459152.1 *Erythrobacter litoralis* HTCC2594  
 ZP\_02902346.1 *Escherichia albertii* TW07627  
 YP\_002886830.1 *Exiguobacterium* sp. AT1b  
 YP\_003912471.1 *Ferrimonas balearica* DSM 9799  
 ZP\_05571281.1 *Ferroplasma acidarmanus* fer1  
 YP\_001193292.1 *Flavobacterium johnsoniae* UW101  
 ZP\_04990009.1 *Francisella novicida* GA99-3548  
 YP\_714703.1 *Frankia alni* ACN14a  
 ZP\_01439734.1 *Fulvimarina pelagi* HTCC2506  
 YP\_003847930.1 *Gallionella capsiferriiformans* ES-2  
 AAB66503.1 *Gallus gallus*  
 ZP\_04776463.1 *Gemella haemolysans* ATCC 10379  
 ZP\_02735861.1 *Gemmata obscuriglobus* UQM 2246  
 YP\_002762295.1 *Gemmatimonas aurantiaca* T-27  
 YP\_146515.1 *Geobacillus kaustophilus* HTA426  
 YP\_001601578.1 *Gluconacetobacter diazotrophicus* PAI 5  
 YP\_191303.1 *Gluconobacter oxydans* 621H  
 YP\_863230.1 *Gramella forsetii* KT0803  
 ZP\_05851527.1 *Granulicatella elegans* ATCC 700633  
 ZP\_06054046.1 *Grimontia hollisae* CIP 101886  
 CBW29505.1 *Haemophilus influenzae* 10810  
 YP\_431972.1 *Hahella chejuensis* KCTC 2396  
 YP\_003270053.1 *Haliangium ochraceum* DSM 14365  
 YP\_003898589.1 *Halomonas elongata* DSM 2581  
 YP\_001002397.1 *Halorhodospira halophila* SL1  
 YP\_003261958.1 *Halothiobacillus neapolitanus* c2  
 ZP\_04580831.1 *Helicobacter bilis* ATCC 43879  
 YP\_003774040.1 *Herbaspirillum seropedicae* SmR1  
 YP\_001100893.1 *Herminiimonas arsenicoxydans*  
 YP\_001546311.1 *Herpetosiphon aurantiacus* ATCC 23779

|                |                                                      |
|----------------|------------------------------------------------------|
| ZP_02165952.1  | <i>Hoeflea phototrophica</i> DFL-43                  |
| BAA00628.1     | <i>Homo sapiens</i>                                  |
| ZP_02177991.1  | <i>Hydrogenivirga</i> sp. 128-5-R1-1                 |
| YP_003432005.1 | <i>Hydrogenobacter thermophilus</i> TK-6             |
| YP_002122164.1 | <i>Hydrogenobaculum</i> sp. Y04AAS1                  |
| YP_003756777.1 | <i>Hyphomicrobium denitrificans</i> ATCC 51888       |
| ZP_01042955.1  | <i>Idiomarina baltica</i> OS145                      |
| YP_004178356.1 | <i>Isosphaera pallida</i> ATCC 43644                 |
| YP_508235.1    | <i>Jannaschia</i> sp. CCS1                           |
| YP_001354575.1 | <i>Janthinobacterium</i> sp. Marseille               |
| YP_003146227.1 | <i>Kangiella koreensis</i> DSM 16069                 |
| YP_003965102.1 | <i>Ketogulonicigenium vulgare</i> Y25                |
| YP_001361302.1 | <i>Kineococcus radiotolerans</i> SRS30216            |
| ZP_04601673.1  | <i>Kingella oralis</i> ATCC 51147                    |
| BAJ31205.1     | <i>Kitasatospora setae</i> KM-6054                   |
| YP_002240023.1 | <i>Klebsiella pneumoniae</i> 342                     |
| ZP_02161937.1  | <i>Kordia algicida</i> OT-1                          |
| YP_003381625.1 | <i>Kribbella flavida</i> DSM 17836                   |
| ZP_06972781.1  | <i>Ktedonobacter racemifer</i> DSM 44963             |
| ZP_05116035.1  | <i>Labrenzia alexandrii</i> DFL-11                   |
| ZP_05745049.1  | <i>Lactobacillus antri</i> DSM 16041                 |
| ZP_05743641.1  | <i>Lactobacillus iners</i> DSM 13335                 |
| YP_003354110.1 | <i>Lactococcus lactis lactis</i> KF147               |
| YP_002796395.1 | <i>Laribacter hongkongensis</i> HLHK9                |
| YP_003998063.1 | <i>Leadbetterella byssophila</i> DSM 17132           |
| ZP_01059609.1  | <i>Leeuwenhoekiella blandensis</i> MED217            |
| YP_122830.1    | <i>Legionella pneumophila</i> str. Paris             |
| ZP_01877243.1  | <i>Lentisphaera araneosa</i> HTCC2155                |
| EES52000.1     | <i>Leptospirillum ferrodiazotrophum</i>              |
| YP_001791595.1 | <i>Leptothrix cholodnii</i> SP-6                     |
| ZP_03914598.1  | <i>Leuconostoc mesenteroides cremoris</i> ATCC 19254 |
| ZP_01914472.1  | <i>Limnobacter</i> sp. MED105                        |
| NP_471646.1    | <i>Listeria innocua</i> Clip11262                    |
| ZP_01002254.1  | <i>Loktanella vestfoldensis</i> SKA53                |
| ZP_03697214.1  | <i>Lutiella nitroferrum</i> 2002                     |
| ZP_07050854.1  | <i>Lysinibacillus fusiformis</i> ZC1                 |
| YP_002560952.1 | <i>Macrococcus caseolyticus</i> JCSC5402             |
| YP_865616.1    | <i>Magnetococcus</i> sp. MC-1                        |
| ZP_04978366.1  | <i>Mannheimia haemolytica</i> PHL213                 |
| YP_958768.1    | <i>Marinobacter aquaeolei</i> VT8                    |
| YP_001341072.1 | <i>Marinomonas</i> sp. MWYL1                         |
| ZP_01012530.1  | <i>Maritimibacter alkaliphilus</i> HTCC2654          |
| YP_004054683.1 | <i>Marivirga tractuosa</i> DSM 4126                  |
| YP_003507187.1 | <i>Meiothermus ruber</i> DSM 1279                    |
| ABF50742.1     | <i>Mesocricetus auratus</i>                          |
| NP_104219.1    | <i>Mesorhizobium loti</i> MAFF303099                 |
| YP_001021685.1 | <i>Methylibium petroleiphilum</i> PM1                |
| YP_544881.1    | <i>Methylobacillus flagellatus</i> KT                |
| ZP_07652810.1  | <i>Methylobacter tundripaludum</i> SV96              |
| YP_001638942.1 | <i>Methylobacterium extorquens</i> PA1               |
| YP_002363938.1 | <i>Methylocella silvestris</i> BL2                   |
| YP_114114.1    | <i>Methylococcus capsulatus</i> str. Bath            |
| ZP_05104653.1  | <i>Methylophaga thiooxidans</i> DMS010               |

ZP\_06886810.1  
YP\_003049146.1  
YP\_003051656.1  
YP\_001655979.1  
YP\_003837328.1  
ZP\_01690083.1  
YP\_003626490.1  
ZP\_01896793.1  
ZP\_07748083.1  
AAA37615.1  
YP\_001134918.1  
YP\_629789.1  
NP\_273760.1  
ZP\_05978462.1  
ZP\_05984461.1  
XP\_001632930.1  
YP\_578605.1  
ZP\_01126444.1  
YP\_003526615.1  
NP\_841517.1  
YP\_747005.1  
YP\_413105.1  
YP\_924102.1  
YP\_001866010.1  
YP\_498605.1  
ZP\_02152442.1  
ZP\_00998988.1  
YP\_004057680.1  
NP\_692089.1  
ZP\_01306620.1  
ZP\_01167499.1  
ZP\_04682825.1  
ZP\_05050716.1  
YP\_002287926.1  
YP\_001819352.1  
ZP\_02328676.1  
ZP\_07377424.1  
YP\_916366.1  
YP\_003854109.1  
ZP\_05920819.1  
YP\_002049510.1  
YP\_049287.1  
YP\_003093870.1  
ZP\_01441700.1  
YP\_002731437.1  
ZP\_02145373.1  
XP\_002179541.1  
XP\_001803227.1  
YP\_129238.1  
YP\_003042212.1  
YP\_023726.1  
YP\_003370976.1  
ZP\_01857739.1  
*Methylosinus trichosporium* OB3b  
*Methylotenera mobilis* JLW8  
*Methylovorus* sp. SIP3-4  
*Microcystis aeruginosa* NIES-843  
*Micromonospora aurantiaca* ATCC 27029  
*Microscilla marina* ATCC 23134  
*Moraxella catarrhalis* RH4  
*Moritella* sp. PE36  
*Mucilaginibacter paludis* DSM 18603  
*Mus musculus*  
*Mycobacterium gilvum* PYR-GCK  
*Myxococcus xanthus* DK 1622  
*Neisseria meningitidis* MC58  
*Neisseria mucosa* ATCC 25996  
*Neisseria subflava* NJ9703  
*Nematostella vectensis*  
*Nitrobacter hamburgensis* X14  
*Nitrococcus mobilis* Nb-231  
*Nitrosococcus halophilus* Nc4  
*Nitrosomonas europaea* ATCC 19718  
*Nitrosomonas eutropha* C91  
*Nitrosospira multiformis* ATCC 25196  
*Nocardioides* sp. JS614  
*Nostoc punctiforme* PCC 73102  
*Novosphingobium aromaticivorans* DSM 12444  
*Oceanibulbus indolifex* HEL-45  
*Oceanicola batsensis* HTCC2597  
*Oceanithermus profundus* DSM 14977  
*Oceanobacillus iheyensis* HTE831  
*Oceanobacter* sp. RED65  
*Oceanospirillum* sp. MED92  
*Ochrobactrum intermedium* LMG 3301  
*Octadecabacter antarcticus* 307  
*Oligotropha carboxidovorans* OM5  
*Opiritatus terrae* PB90-1  
*Paenibacillus larvae larvae* BRL-230010  
*Pantoea* sp. aB  
*Paracoccus denitrificans* PD1222  
*Parvularcula bermudensis* HTCC2503  
*Pasteurella dagmatis* ATCC 43325  
*Paulinella chromatophora*  
*Pectobacterium atrosepticum* SCRI1043  
*Pedobacter heparinus* DSM 2366  
*Pelagibaca bermudensis* HTCC2601  
*Persephonella marina* EX-H1  
*Phaeobacter gallaeciensis* BS107  
*Phaeodactylum tricorutum* CCAP 1055/1  
*Phaeosphaeria nodorum* SN15  
*Photobacterium profundum* SS9  
*Photorhabdus asymbiotica*  
*Picrophilus torridus* DSM 9790  
*Pirellula staleyi* DSM 6068  
*Planctomyces maris* DSM 8797

|                |                                                             |
|----------------|-------------------------------------------------------------|
| ZP_08094640.1  | <i>Planococcus donghaensis</i> MPA1U2                       |
| CAC82988.1     | <i>Plasmodium falciparum</i>                                |
| CAD12105.1     | <i>Plasmodium yoelii</i>                                    |
| ZP_01905842.1  | <i>Plesiocystis pacifica</i> SIR-1                          |
| ZP_01117850.1  | <i>Polaribacter irgensii</i> 23-P                           |
| YP_001798192.1 | <i>Polynucleobacter necessarius necessarius</i> STIR1       |
| EFA74915.1     | <i>Polysphondylium pallidum</i> PN500                       |
| NP_001126366.1 | <i>Pongo abelii</i>                                         |
| NP_904470.1    | <i>Porphyromonas gingivalis</i> W83                         |
| YP_001014409.1 | <i>Prochlorococcus marinus</i> str. NATL1A                  |
| YP_003688804.1 | <i>Propionibacterium freudenreichii shermanii</i> CIRM-BIA1 |
| YP_002151902.1 | <i>Proteus mirabilis</i> HI4320                             |
| ZP_06125476.1  | <i>Providencia rettgeri</i> DSM 1131                        |
| YP_663541.1    | <i>Pseudoalteromonas atlantica</i> T6c                      |
| YP_001350636.1 | <i>Pseudomonas aeruginosa</i> PA7                           |
| YP_606608.1    | <i>Pseudomonas entomophila</i> L48                          |
| YP_002870420.1 | <i>Pseudomonas fluorescens</i> SBW25                        |
| YP_001186576.1 | <i>Pseudomonas mendocina</i> ymp                            |
| ADR58476.1     | <i>Pseudomonas putida</i> BIRD-1                            |
| YP_001172484.1 | <i>Pseudomonas stutzeri</i> A1501                           |
| NP_790962.1    | <i>Pseudomonas syringae</i> pv. tomato str. DC3000          |
| ZP_05086468.1  | <i>Pseudovibrio</i> sp. JE062                               |
| YP_263679.1    | <i>Psychrobacter arcticus</i> 273-4                         |
| ZP_01252533.1  | <i>Psychroflexus torquis</i> ATCC 700755                    |
| YP_943855.1    | <i>Psychromonas ingrahamii</i> 37                           |
| EFQ91097.1     | <i>Pyrenophora teres</i> f. <i>teres</i> 0-1                |
| YP_725643.1    | <i>Ralstonia eutropha</i> H16                               |
| EDM14670.1     | <i>Rattus norvegicus</i>                                    |
| ZP_01113141.1  | <i>Reinekea</i> sp. MED297                                  |
| YP_001624374.1 | <i>Renibacterium salmoninarum</i> ATCC 33209                |
| YP_001979926.1 | <i>Rhizobium etli</i> CIAT 652                              |
| YP_354280.1    | <i>Rhodobacter sphaeroides</i> 2.4.1                        |
| YP_002526955.1 | <i>Rhodobacter sphaeroides</i> KD131                        |
| YP_522808.1    | <i>Rhodoferax ferrireducens</i> T118                        |
| YP_004012040.1 | <i>Rhodomicrobium vannielii</i> ATCC 17100                  |
| YP_001989976.1 | <i>Rhodopseudomonas palustris</i> TIE-1                     |
| YP_002299712.1 | <i>Rhodospirillum centenum</i> SW                           |
| ZP_02061957.1  | <i>Rickettsiella grylli</i>                                 |
| YP_004046068.1 | <i>Riemerella anatipestifer</i> DSM 15868                   |
| YP_003194216.1 | <i>Robiginitalea biformata</i> HTCC2501                     |
| ZP_07659792.1  | <i>Roseibium</i> sp. TrichSKD4                              |
| YP_001432135.1 | <i>Roseiflexus castenholzii</i> DSM 13941                   |
| ZP_02140439.1  | <i>Roseobacter litoralis</i> Och 149                        |
| ZP_06897188.1  | <i>Roseomonas cervicalis</i> ATCC 49957                     |
| ZP_00959476.1  | <i>Roseovarius nubinhibens</i> ISM                          |
| YP_165347.1    | <i>Ruegeria pomeroyi</i> DSS-3                              |
| YP_525605.1    | <i>Saccharophagus degradans</i> 2-40                        |
| ZP_01745881.1  | <i>Sagittula stellata</i> E-37                              |
| YP_001159838.1 | <i>Salinispora tropica</i> CNB-440                          |
| YP_003313619.1 | <i>Sanguibacter keddieii</i> DSM 10542                      |
| ZP_06756399.1  | <i>Scardovia inopinata</i> F0304                            |
| XP_002574902.1 | <i>Schistosoma mansoni</i>                                  |
| YP_003659790.1 | <i>Segniliparus rotundus</i> DSM 44985                      |

ZP\_06191885.1  
 YP\_927193.1  
 YP\_003523671.1  
 ZP\_05785696.1  
 ZP\_06753699.1  
 YP\_001328356.1  
 ZP\_06160431.1  
 YP\_454374.1  
 YP\_001612320.1  
 YP\_003320569.1  
 ZP\_03968961.1  
 ZP\_07575244.1  
 YP\_001265074.1  
 YP\_617295.1  
 YP\_003385511.1  
 YP\_301056.1  
 ZP\_01545825.1  
 YP\_003695760.1  
 YP\_001974272.1  
 ZP\_01459698.1  
 NP\_722354.1  
 YP\_001035270.1  
 ZP\_06908974.1  
 YP\_003342229.1  
 ZP\_00954522.1  
 YP\_393431.1  
 YP\_001358976.1  
 NP\_001163994.1  
 YP\_073989.1  
 YP\_731203.1  
 YP\_003075593.1  
 ZP\_05342562.1  
 EED96635.1  
 YP\_002355372.1  
 YP\_004101607.1  
 YP\_003324302.1  
 YP\_290001.1  
 YP\_002522588.1  
 YP\_003299304.1  
 NP\_393791.1  
 ZP\_03495934.1  
 YP\_003459504.1  
 YP\_315791.1  
 YP\_392128.1  
 YP\_003643370.1  
 YP\_002893397.1  
 XP\_002365079.1  
 XP\_970181.1  
 YP\_002944317.1  
 ZP\_04600320.1  
 YP\_996351.1  
 ZP\_05059070.1  
 ZP\_01235835.1

*Serratia odorifera* 4Rx13  
*Shewanella amazonensis* SB2B  
*Sideroxydans lithotrophicus* ES-1  
*Silicibacter lacuscaerulensis* ITI-1157  
*Simonsiella muelleri* ATCC 29453  
*Sinorhizobium medicae* WSM419  
*Slackia exigua* ATCC 700122  
*Sodalis glossinidius* str. 'morsitans'  
*Sorangium cellulosum* 'So ce 56'  
*Sphaerobacter thermophilus* DSM 20745  
*Sphingobacterium spiritivorum* ATCC 33300  
*Sphingobium chlorophenolicum* L-1  
*Sphingomonas wittichii* RW1  
*Sphingopyxis alaskensis* RB2256  
*Spirosoma linguale* DSM 74  
*Staphylococcus saprophyticus saprophyticus* ATCC 15305  
*Stappia aggregata* IAM 12614  
*Starkeya novella* DSM 506  
*Stenotrophomonas maltophilia* K279a  
*Stigmatella aurantiaca* DW4/3-1  
*Streptococcus mutans* UA159  
*Streptococcus sanguinis* SK36  
*Streptomyces pristinaespiralis* ATCC 25486  
*Streptosporangium roseum* DSM 43021  
*Sulfitobacter* sp. EE-36  
*Sulfurimonas denitrificans* DSM 1251  
*Sulfurovum* sp. NBC37-1  
*Sus scrofa*  
*Symbiobacterium thermophilum* IAM 14863  
*Synechococcus* sp. CC9311  
*Teredinibacter turnerae* T7901  
*Thalassiobium* sp. R2A62  
*Thalassiosira pseudonana* CCMP1335  
*Thauera* sp. MZ1T  
*Thermaerobacter marianensis* DSM 12885  
*Thermobaculum terrenum* ATCC BAA-798  
*Thermobifida fusca* YX  
*Thermomicrobium roseum* DSM 5159  
*Thermomonospora curvata* DSM 43183  
*Thermoplasma acidophilum* DSM 1728  
*Thermus aquaticus* Y51MC23  
*Thioalkalivibrio* sp. K90mix  
*Thiobacillus denitrificans* ATCC 25259  
*Thiomicrospira crunogena* XCL-2  
*Thiomonas intermedia* K12  
*Tolumonas auensis* DSM 9187  
*Toxoplasma gondii* ME49  
*Tribolium castaneum*  
*Variovorax paradoxus* S110  
*Veillonella dispar* ATCC 17748  
*Verminephrobacter eiseniae* EF01-2  
*Verrucomicrobiae bacterium* DG1235  
*Vibrio angustum* S14

|                |                                                                               |
|----------------|-------------------------------------------------------------------------------|
| YP_003709810.1 | <i>Waddlia chondrophila</i> WSU 86-1044                                       |
| NP_871532.1    | <i>Wigglesworthia glossinidia</i> endosymbiont of <i>Glossina brevipalpis</i> |
| YP_001417711.1 | <i>Xanthobacter autotrophicus</i> Py2                                         |
| YP_003374601.1 | <i>Xanthomonas albilineans</i>                                                |
| XP_002934473.1 | <i>Xenopus (Silurana) tropicalis</i>                                          |
| YP_003467510.1 | <i>Xenorhabdus bovienii</i> SS-2004                                           |
| YP_003327196.1 | <i>Xylanimonas cellulositytica</i> DSM 15894                                  |
| NP_297856.1    | <i>Xylella fastidiosa</i> 9a5c                                                |
| YP_001164088.1 | <i>Yersinia pestis</i> Pestoides F                                            |
| YP_003582675.1 | <i>Zunongwangia profunda</i> SM-A87                                           |
| ZP_04758959.1  | <i>Zymomonas mobilis mobilis</i> ATCC 10988                                   |

GenBank accession numbers (except for *C. fasciculata*, which has the TriTrypDB scaffold number and coordinates) in bold typeface were sequenced in this work.
